RESEARCH ARTICLE

# Low Dose Focused Ultrasound Induces Enhanced Tumor Accumulation of Natural Killer Cells

Naomi S. Sta Maria<sup>1</sup>, Samuel R. Barnes<sup>1</sup>, Michael R. Weist<sup>2</sup>, David Colcher<sup>2</sup>, Andrew A. Raubitschek<sup>2</sup>, Russell E. Jacobs<sup>1\*</sup>

**1** Division of Biology and Biological Engineering, Beckman Institute, California Institute of Technology, Pasadena, CA, United States of America, **2** Department of Cancer Immunotherapeutics and Tumor Immunology, Beckman Institute, City of Hope, Duarte, CA, United States of America

\* [rjacobs@caltech.edu](mailto:rjacobs@caltech.edu)

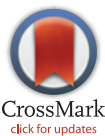

OPEN ACCESS

**Citation:** Sta Maria NS, Barnes SR, Weist MR, Colcher D, Raubitschek AA, Jacobs RE (2015) Low Dose Focused Ultrasound Induces Enhanced Tumor Accumulation of Natural Killer Cells. PLoS ONE 10 (11): e0142767. doi:10.1371/journal.pone.0142767

**Editor:** Mario U. Mondelli, University of Pavia, ITALY

**Received:** July 8, 2015

**Accepted:** October 27, 2015

**Published:** November 10, 2015

**Copyright:** © 2015 Sta Maria et al. This is an open access article distributed under the terms of the [Creative Commons Attribution License](http://creativecommons.org/licenses/by/4.0/), which permits unrestricted use, distribution, and reproduction in any medium, provided the original author and source are credited.

**Data Availability Statement:** All relevant data are within the paper and its Supporting Information files.

**Funding:** This work was supported by the National Institutes of Health (EB000993) (<http://www.nibib.nih.gov/>) and the Beckman Institute at Caltech (<http://www.beckmaninstitute.caltech.edu/>) to REJ; and National Institutes of Health (CA43904) (<http://www.cancer.gov/>) and the Beckman Institute at the City of Hope (<http://www.cityofhope.org/beckman-research-institute>) to DC. The funders had no role in study design, data collection and analysis, decision to publish, or preparation of the manuscript.

## Abstract

Natural killer (NK) cells play a vital antitumor role as part of the innate immune system. Efficacy of adoptive transfer of NK cells depends on their ability to recognize and target tumors. We investigated whether low dose focused ultrasound with microbubbles (*ldbFUS*) could facilitate the targeting and accumulation of NK cells in a mouse xenograft of human colorectal adenocarcinoma (carcinoembryonic antigen (CEA)-expressing LS-174T implanted in NOD.Cg-Prkdc<sup>scid</sup>Il2rg<sup>tm1Wjl</sup>/SzJ (NSG) mice) in the presence of an anti-CEA immunocytokine (ICK), hT84.66/M5A-IL-2 (M5A-IL-2). Human NK cells were labeled with an FDA-approved ultra-small superparamagnetic iron oxide particle, ferumoxytol. Simultaneous with the intravenous injection of microbubbles, focused ultrasound was applied to the tumor. *In vivo* longitudinal magnetic resonance imaging (MRI) identified enhanced accumulation of NK cells in the ensonified tumor, which was validated by endpoint histology. Significant accumulation of NK cells was observed up to 24 hrs at the tumor site when ensonified with 0.50 MPa peak acoustic pressure *ldbFUS*, whereas tumors treated with 0.25 MPa showed no detectable NK cell accumulation. These clinically translatable results show that *ldbFUS* of the tumor mass can potentiate tumor homing of NK cells that can be evaluated non-invasively using MRI.

## Introduction

Natural killers (NK) cells are critical components of the immune system that show promise in cancer immunotherapy based on their ability to lyse malignant and infected cells without prior sensitization or immunization [1, 2]. NK cells have the ability to discriminate between “normal self” and “altered-self” through MHC class I—specific inhibitory receptors and activating receptors (“missing-self recognition”) [1]. It is the balance between inhibitory and activating receptors that direct NK cell activity. Activating receptors recognize upregulated proteins or pathogen-encoded ligands expressed by infected or tumor transformed cells and not by the host cells [1, 3].

**Competing Interests:** The authors have declared that no competing interests exist.

NK cells are categorized into two subsets depending on the level of CD56 expression [4]. CD56<sup>dim</sup> NK cells are predominantly cytolytic and often express high levels of low-affinity Fc receptor for IgG (FcγRIIR-CD16) that allows them to recognize antibodies on target cells and trigger NK cell mediated antibody-dependent cell-mediated cytotoxicity (ADCC). Monoclonal antibody treatments of non-Hodgkin lymphoma (with anti-CD20 –Rituximab) and metastatic breast cancer (with anti-trastuzumab/Herceptin) have shown that ADCC is NK cell-mediated [5–7]. CD56<sup>bright</sup> NK cells have mainly modulatory roles by producing cytokines that activate cells of the immune system through their cytokine receptors. Cytotoxic and cytokine production functions of NK cells can impact downstream members of both the innate and adaptive immune systems, such as dendritic cells, macrophages, neutrophils, and T and B cells, and promote suppression of infected and tumor cells. Further, interaction with other immune cells, such as dendritic cells, and effector mechanisms like interferons and cytokines (IL-1, IL-12, IL-15, IL-18, and IL-21) can also potentiate NK cell activity, surveillance, development and maturation [1, 3].

The use of NK cells in immunotherapy [8] is being explored through alteration of NK cells for adoptive transfer [9] as well as modification of the immune and tumor environment using antibodies, cytokines, chemokines, and physical manipulation via focused ultrasound [9, 10]. *Ex vivo* activated and expanded autologous NK cells that are adoptively transferred back to patients have shown some success in NK cells tumor accumulation and tumor cell killing [11]. Treatments with allogenic NK cells have also shown greater NK cell activity through killer cell like inhibitory receptor (KIR) mismatch, which contributes to the alloreactivity of NK cells via the “missing-self recognition” mechanism [12, 13]. Alternatively, NK cell lines, which can be used for adoptive transfer treatments, provide a sustained supply of cytotoxic NK cells without a donor and are maintained using good manufacturing practice (GMP) [14]. Moreover, genetic modification of NK cells receptors can also be used to optimize tumor targeting of NK cells [9].

Focused ultrasound (FUS) with microbubbles has been used to promote delivery and targeting of genes, pharmaceuticals, and adoptive cell transfer therapies [10]; and as a treatment in itself. Using low power FUS (0.6 & 1.4 MPa peak-rarefactional acoustic pressures) in a mouse tumor model, Liu *et al.* observed some tumor regression as well as transient increases in infiltration of non-T regulatory tumor infiltrating lymphocytes and longer term infiltration (>3 days) of CD8<sup>+</sup> cytotoxic T-lymphocytes [15]. They suggest that this response is related to vascular permeability perturbations known to be associated with FUS [16–21] that could induce long term physiological changes. In studies of temporary blood-brain-barrier (BBB) opening with FUS, histology indicates little or no tissue structural perturbations at maximum absolute pressures less than 0.6 MPa with duty cycles approximately 5% that produce stable but not inertial microbubble cavitation [21–25]. Because local BBB permeability changes persist for several days, there are likely physiological/biochemical as well as physical changes induced by FUS [26]. Focused ultrasound has been shown to temporarily open the blood-brain-barrier (BBB) and promote successful penetration of targeted NK-92 cells expressing a chimeric HER2 antigen receptor (NK-92-scFv(FRP5)-zeta cells) and accumulation in HER2-expressing human breast metastasis model in rodents [27].

To be potent in treating solid tumors, NK cells must accumulate at the tumor site so that their cytotoxic effects will have maximum impact. In this study, we examined whether low dose FUS with microbubble stable cavitation (*ldb*FUS) can facilitate accumulation of human NK cells in a mouse xenograft of human colorectal adenocarcinoma (carcinoembryonic antigen (CEA)-expressing LS-174T) model in the presence of immunocytokine (ICK), hT84.66/M5A-IL-2 (M5A-IL-2). ICKs are a fusion of antibody-specific monoclonal antibody (mAb) and immune stimulating cytokine [28]. M5A-IL-2 is a fusion of a humanized anti-CEA mAb to IL-2. There are two roles of the ICK. First, the administration of ICK to mice is needed to

stabilize NK cell viability and expansion *in vivo*. Miller and colleagues demonstrated that *ex vivo* activated NK cell expansion *in vivo* decreased by 90% one week after cytokine administration was discontinued [29]. Second, the ICK was used to target the tumor expressing CEA via the antibody portion M5A, and home in the targeting of NK cells, which express IL-2 receptors, to the tumor site via the cytokine IL-2. NK cell accumulation was assessed *in vivo* by first labeling NK cells with ferumoxytol (an FDA-approved ultra-small superparamagnetic iron oxide (USPIO) nanoparticle suspension) and then monitoring them using MRI.

## Materials and Methods

### Animal Model

The Institutional Animal Care and Use Committees (IACUC) of the California Institute of Technology and City of Hope approved this research study. All procedures were approved and conformed to the guidelines set out by the IACUC of both California Institute of Technology and City of Hope. NOD.Cg-Prkdc<sup>scid</sup>Il2rg<sup>tm1Wjl</sup>/SzJ (NSG) female mice (at least 10 weeks old from JAX breeding stock) were subcutaneously (s.c.) injected with LS-174T tumor cells ( $6 \times 10^5$  cells in 0.2 ml) at both right and left lower flank sites. Optimal tumor sizes ( $\sim 200\text{--}500 \text{ mm}^3$ ) were achieved approximately 12 days post implantation. On the day of the *ldbFUS* and imaging, animals were given intravenous immunoglobulin (IVIG, 0.9 mg, i.p.) and immunocytokine (ICK, M5A-IL-2, 50 $\mu\text{g}$ , s.c.) 3–4 hours and 1 hour prior to intravenous tail vein injection of ferumoxytol-labeled NK cells (Fe-NK), respectively. Twenty-two animals received higher power *ldbFUS*/0.50MPa on one of the tumors during the combined microbubble/Fe-NK cell injection, while the contralateral tumor served as a control. Ten animals underwent the same procedure at a lower power *ldbFUS*/0.25MPa.

### Tumor Groups

All animals had bilateral LS-174T tumors on the high flank and received a dose of  $10^7$  Fe-NK cells with the Optison microbubbles during *ldbFUS*. Tumors were grouped as follows: (+) *ldbFUS*/0.50MPa ( $n = 22$ ), (-)*ldbFUS*/0.50MPa ( $n = 22$ ), (+)*ldbFUS*/0.25MPa ( $n = 10$ ), and (-)*ldbFUS*/0.25MPa ( $n = 10$ ).

### Cells and Culture Conditions

**Tumor Cells.** Firefly luciferase expressing human colorectal adenocarcinoma cells (LS-174T) were collected in a suspension by trypsinizing culture after rinsing with DPBS (Dulbecco's phosphate-buffered saline). The suspended cells were collected in culture media in a single 50ml conical tube and spun at 1200 rpm for 5 min in a bucket rotor centrifuge to remove trypsin from media. After centrifugation the supernatant was discarded and the cell pellet was re-suspended to the concentration of  $3 \times 10^6/\text{ml}$  in 1% HSA in HBSS (human serum albumin/Hank's buffered salt solution). Suspension in the conical tube was placed on ice.

**Natural Killer Cells.** Natural killer cells were purified from peripheral blood mononuclear cells (PBMC) that were isolated from whole blood by gradient centrifugation using Histopaque 1077 (Sigma-Aldrich). NK cells were purified from PMBC by negative selection using EasyStep Human NK Cell Enrichment Kit (Stem Cell) following the manufacturer's instructions. After purification, NK cells were mixed with irradiated K562 cells transfected with murine IL-21 (obtained from Dean A. Lee, MD Andersen Cancer Center, Houston TX, in June 2012) at ratio of 1:2 (NK:K562) and co-cultured at  $0.125 \times 10^6$  NK/ml in NK expansion medium (RPMI-1640 + 5% human AB serum + 1x GlutaMax and 5ng/ml rhIL2). Cells were fed every 2–3 days and after 14 days, NK cells were frozen at  $5 \times 10^7/\text{vial}$  in 90% heat inactivated Human AB serum and

10% DMSO. For each experiment NK cells were reactivated and expanded by co-culture with feeder cells and rhIL2 for a maximum of 2 weeks. The cells were shown to express CD56 by FACS analysis and were able to lyse LS-174T cells (84% lysis at 8:1 NK: target ratio). Isolated NK cells were expanded, purified and assessed following previously published standard protocol [11].

## NK Cell Labeling

**Labeling with Ferumoxytol.** NK cells were labeled with USPIO ferumoxytol (100 µg/ml, Feraheme, AMG Pharmaceuticals, hydrodynamic diameter 30 nm) by incubating them in medium containing clinical grade protamine sulfate (40 µg/ml, APP Pharmaceuticals) as a transfection agent for 2 hours [30]. After incubation, NK cells were washed with HBSS and centrifuged at 400 g for 5 min, twice.  $10^7$  NK cells were re-suspended in 100 µl volume of HBSS for use for each subject. NK cell viability was > 90% before and after labeling, with a labeling efficiency of >95%. Inductively Coupled Plasma Mass Spectrometry (ICP-MS) was performed and the average concentration of iron per NK cell was determined to be 0.1 (0.09–0.14) pg/cell. We and others observed no deleterious effects on NK cell viability at this low iron content [31, 32].

**Labeling with CFSE.** To obtain an independent measure of NK cell tumor accumulation, two NSG mice bearing bilateral flank LS-174T tumors underwent the same *ldbFUS* procedure but received NK cells that were labeled with carboxyfluorescein diacetate succinimidyl ester (CFSE, CellTrace™, Life Technologies). CFSE was thawed for 1 hr prior to use with care to limit light exposure to any sample containing CFSE. NK cells were aliquoted from expanded stock, washed twice with HBSS and centrifuged at 400 g for 10 min, and resuspended to  $20 \times 10^6$  cell/ml in HBSS. After cell viability counts, NK cells were incubated in 5 µM CFSE for 15 min in the dark at 37°C. Following incubation, labeled NK cell were centrifuged at 400 g for 5 min, resuspended in 0.5 ml HBSS + 1% HSA, and incubated again at 37°C for 30 min to ensure complete modification of CFSE. The cell suspension was centrifuged at 400 g for 5 min and resuspended to  $100 \times 10^6$  cells/ml in 1% HSA in DPBS. 100 µl of the cell suspension was drawn for the final injection dose.

## Low Dose Bubble-mediated Focused Ultrasound (*ldbFUS*)

We used a 6.4 cm 510 kHz transducer, integrated hydrophone (H107 & Y107 Sonic Concepts, Bothell, WA) and a coupling cone filled with degassed water. Agilent 33220A function generator drove a Henry Electronics 50 watt amp and a Tektronics TDS3014B oscilloscope in FFT mode monitored the hydrophone. An RP Acoustics (Leutenbach, DE) PVDF hydrophone (RP24I) was used to calibrate the negative peak rarefaction pressure of the H107 transducer. In a tank of degassed water, we placed the RP24I tip 5 mm from the coupling membrane of the coupling cone (filled with degassed water) housing the H107 transducer. 5 mm was chosen as that is the approximate expected tumor radius. By varying the  $mV_{\text{rms}}$  from the function generator driving the power amplifier and assuming an 18% attenuation, we found that 40  $mV_{\text{rms}}$  and 150  $mV_{\text{rms}}$  will deliver 0.25 MPa and 0.5 MPa respectively to the mouse tumor.

While under anesthesia (1.5% isoflurane), the mouse was placed in the stereotaxic frame and the coupling cone was positioned on the tumor with ultrasound transmission gel (Aquasonic 100, Parker) (Fig 1). The transducer was driven at its center frequency (510 kHz) for 10 ms every second for 1 minute. During the 1 minute of ultrasound, 100 µl Optison (GE Healthcare) microbubbles plus 100 µl of  $\sim 10^7$  ferumoxytol-labeled NK cells (Fe-NK) or CFSE labeled NK cells (total volume of 200 µl) was delivered via tail vein catheter.

## MRI

2D Multi Gradient Echo (MGE) was performed on a 7T Bruker-Biospin scanner with the following parameters: repetition time (TR), 1500 ms, 6 echoes starting at 3.74 ms and spacing of 4.84 ms; field of view (FOV), 3.5 cm x 2.5 cm; spatial resolution, 0.150 mm x 0.150 mm; slice thickness, 0.75 mm; matrix size = 233 x 167; and 4 averages. The RF coil used for imaging was a 35 mm diameter quadrature volume coil (M2M Imaging Corporation, Cleveland, OH). Animals were induced and maintained with 1.5% isoflurane anesthesia and were placed in an acrylic cradle where body temperature was maintained using warm air and respiration was monitored (Biopac Systems). Acquisition was respiration-gated. Tumor size dictated the number of slices acquired to ensure full coverage of the tumor mass.

To determine *in vivo* concentrations of ferumoxytol labeled NK cells, we measured  $R_2^*$  relaxation rates as a function of NK cell concentration (Fig 2).  $R_2^*$  is linear with iron concentration in the ranges of interest and therefore with NK cell concentration. Ferumoxytol labeled NK cells were suspended in 26% Ficoll or 1% agar solution and  $R_2^*$  was determined using 2D

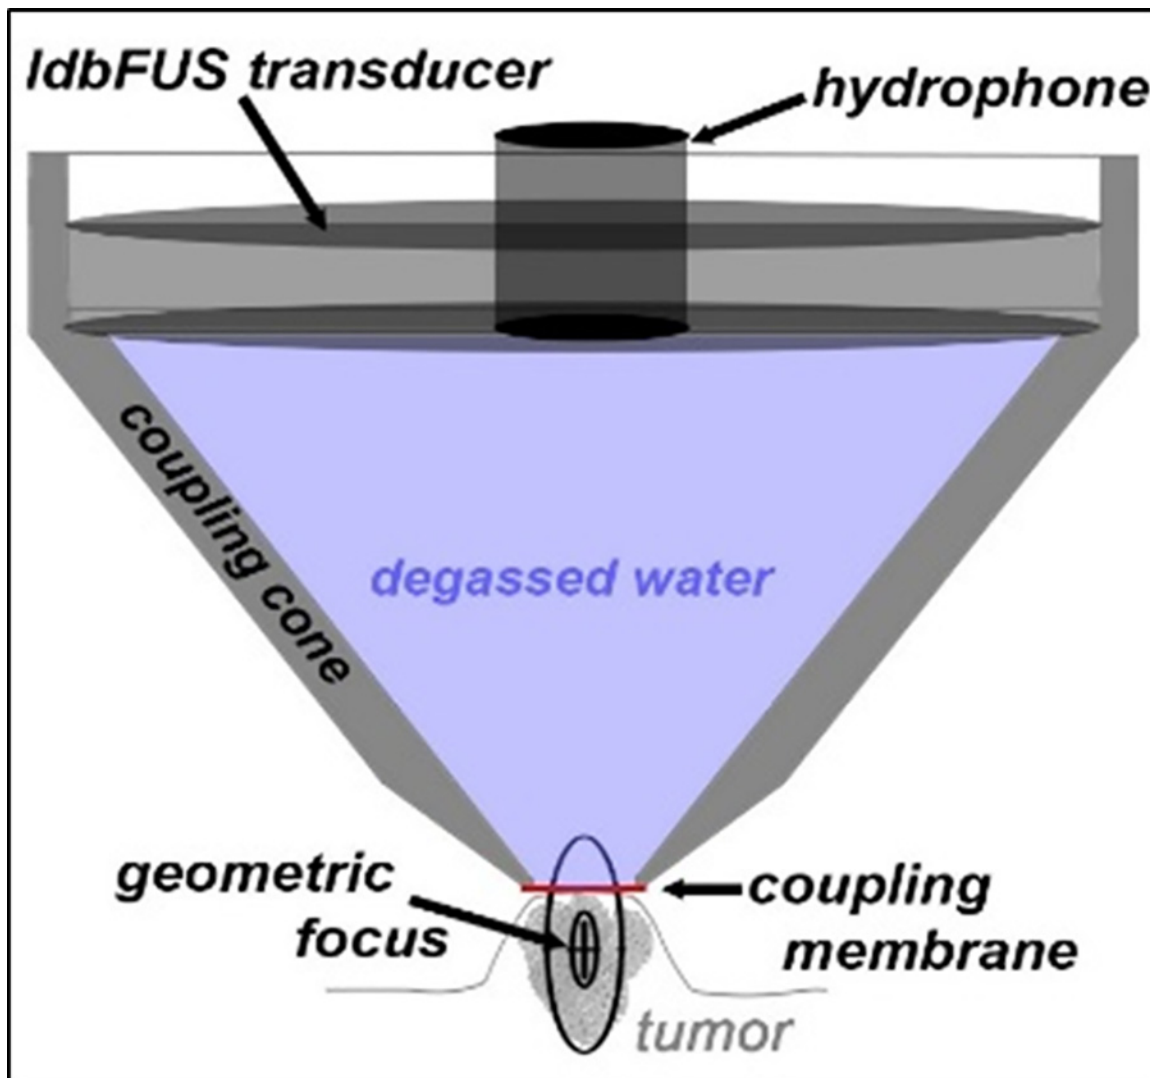

**Fig 1. Diagram of ldbFUS setup.** ldbFUS transducer and hydrophone (Sonic Concepts H107 & Y107) are fixed in a plastic coupling cone filled with degassed water and sealed with a thin membrane. Ultrasound gel between membrane & tumor ensure good sonic contact. Focal region of ldbFUS transducer is ~5mm diameter & 15mm long; centered below the coupling membrane and within the tumor.

doi:10.1371/journal.pone.0142767.g001



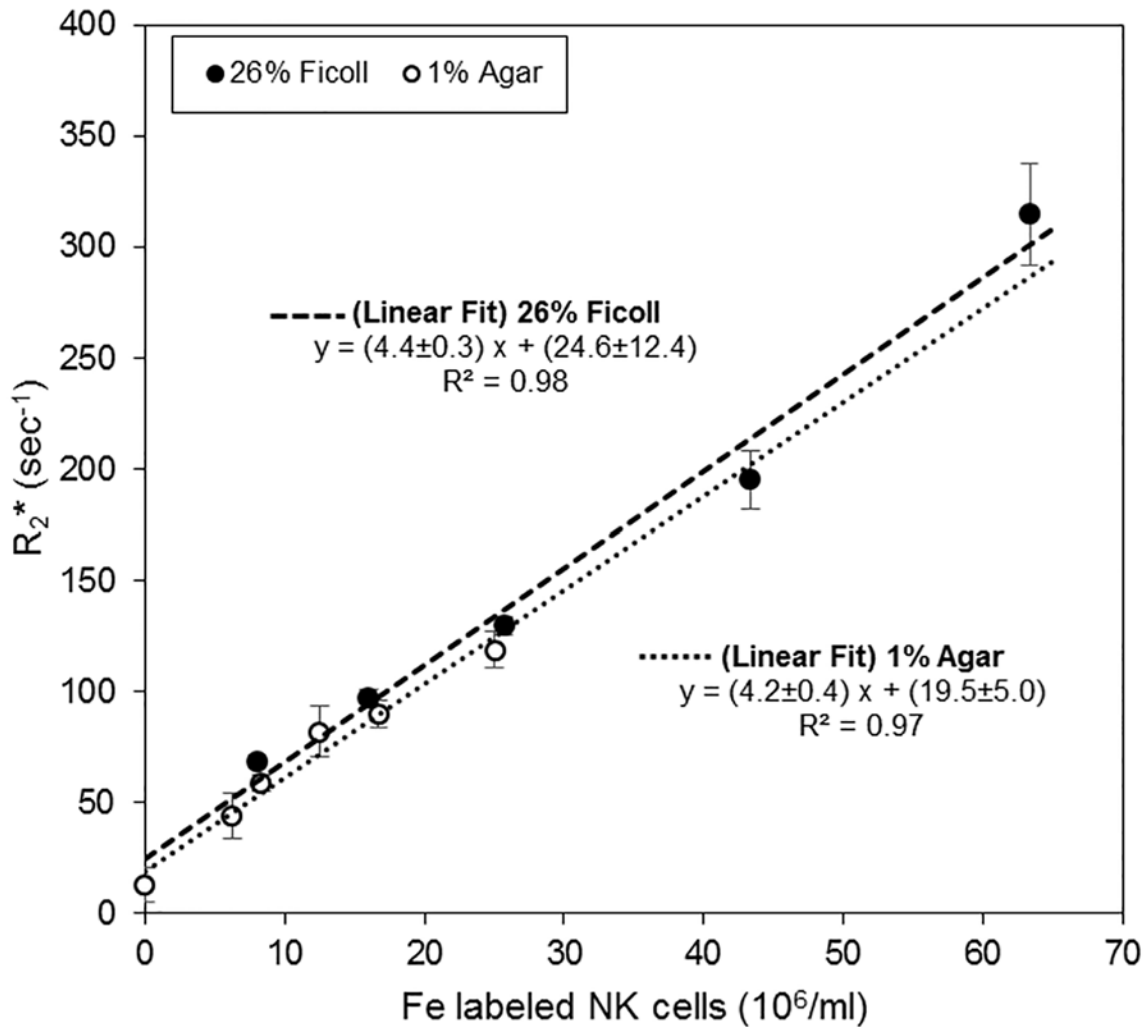

**Fig 2. Relaxation rate is linear in Fe labeled NK cell concentration.** Ferumoxylol labeled NK cells were suspended in both 26% Ficoll and 1% agar solutions and  $R_2^*$  determined at 7T using 2D MGE protocol (mean±SD). There is no significant difference between fitted slopes and intercepts of Fe-NK suspensions in 26% Ficoll and 1% agar solutions.

doi:10.1371/journal.pone.0142767.g002

MGE. For Fe-NK suspended in 1% agar the following parameters were used: repetition time (TR) = 1500 ms, 6 echoes starting at 3.74 ms and spacing of 4.84 ms; field of view (FOV) = 3.5 cm x 2.5 cm; spatial resolution = 0.150 mm x 0.150 mm; slice thickness = 0.75 mm; matrix size = 233 x 167; and averages = 4. For Fe-NK suspended in 26% Ficoll the following parameters were used: TR = 1500 ms, 16 echoes starting at 4.27 ms and spacing of 5.88 ms; FOV = 6 cm x 2 cm; spatial resolution = 0.200 mm x 0.200 mm; slice thickness = 3 mm; matrix size = 300 x 100; and averages = 4. The RF coil used for imaging was a 35 mm diameter quadrature volume coil (M2M Imaging Corporation, Cleveland, OH).

To determine whether the *ldbFUS*/Fe-NK (0.50 MPa) induces changes in the tumor environment, a subset of the NSG mice underwent diffusion weighted imaging to determine changes in apparent diffusion coefficient (ADC) before and after *ldbFUS*/Fe-NK administration. ADC has been correlated with tumor cellularity, extracellular volume, edema and tumor grade, and even to tumor treatment responses [33–35]. Diffusion MRI was acquired with the

following parameters: TR/TE = 2250 ms / 27.5 ms, with six  $b$  values = 0, 100, 200, 400, 600, and 800 s/mm<sup>2</sup> acquired in 3 orthogonal directions; FOV = 3.2 cm x 2 cm; slice thickness = 1.5; spatial resolution = 150 mm x 299 mm; matrix size = 233 x 67; NA = 1.

**MRI Analysis.** Using ROCKETSHIP v.1.1 code [36] in MATLAB (R2014b),  $T_2^*$  and ADC maps were generated through a pixel-by-pixel exponential fitting of signal intensities across the different TE times and  $b$  values, respectively. In each tumor at each time point a region of interest (ROI) was manually drawn using ImageJ2 [37] over every tumor slice so that the ROI encompassed the whole tumor.  $R_2^*$  maps were generated by taking the inverse of the  $T_2^*$  map ( $R_2^* = 1/T_2^*$ ). Histogram frequency distribution of  $R_2^*$  values (range = 0–200 sec<sup>-1</sup>, bin width = 1) were obtained for each tumor at each time point. The  $R_2^*$  geometric means were obtained by fitting the  $R_2^*$  histogram to a lognormal distribution (MATLAB). Because tumors have a nonzero 'background'  $R_2^*$ , the change in  $R_2^*$  ( $\Delta R_2^*$ ) measures the concentration of NK cells that accumulates in the tumor ROI.  $\Delta R_2^*$  is calculated by taking the difference between the  $R_2^*$  values at the time points post Fe-NK injection and the pre-injection  $R_2^*$  values.

## Histological Analysis

Following the 6 hr time point post *ldbFUS*/Fe-NK administration, 3 NSG mice that received 0.50 MPa *ldbFUS* were euthanized by CO<sub>2</sub> inhalation and underwent cardiac perfusion using 4% paraformaldehyde in 0.1 M phosphate buffer saline. The (+)*ldbFUS* and (-)*ldbFUS* tumors and spleen were removed and placed in PBS with 0.01% sodium azide and stored at 4°C. Tissues were prepared in an OCT<sup>®</sup> (frozen tissue matrix) block and were stored at -80°C. Prior to cutting sections, the block was allowed to equilibrate to -20°C. Tissue blocks were sectioned at 18µm thickness. Sections were stained with horseradish peroxidase (HRP) with anti-CD56 (NK cell marker) and Prussian blue for the detection of iron oxide ferumoxytol particles. Sections from the same blocks were also stained for anti-CD56 fluorescence markers (546 nm) and DAPI. Images from sections were captured using Zeiss upright widefield microscope and ZEN software. Fluorescent positive-anti-CD56 counts were quantified using ImageJ2 Analyze Particles from (+)*ldbFUS* and (-)*ldbFUS* tumor sections. The 2 mice that received NK-CSFE cells underwent the same procedure for tissue preparation and sectioning. NK-CSFE images were acquired using Hamamatsu NanoZoomer 2.0 HT and positive-NK-CSFE counts were quantified using Image Pro Premier 9.1 software.

## Statistical Analysis

MATLAB (R2014b) was used for all statistical analyses.  $\Delta R_2^*$  values of the different groups at each time point were represented in box plots. Group comparisons were performed using Kruskal-Wallis H test with a Bonferroni post hoc test. Planned group comparisons were performed using the Wilcoxon rank sum test. Comparison between pre and post time points used the Wilcoxon signed-rank paired test. Mean  $\pm$  standard deviation (SD) were presented for NK cell concentration accumulation, determined from  $\Delta R_2^*$  or quantitation from anti-CD56 and CSFE histology. Student's t-tests were used to analyze NK cell accumulation in tumors following *ldbFUS*/Fe-NK treatment. Statistical significance was noted if  $p < 0.05$ .

## Results

We first established that  $R_2^*$  is a linear function of ferumoxytol labeled NK cell concentration over the concentration range of interest in the study (Fig 2). Various concentrations of ferumoxytol labeled NK cells were suspended in either 26% Ficoll or 1% agar solution and  $R_2^*$  values were determined at 7T. For every increase of 10<sup>6</sup> NK cells per ml we observed an increase in  $R_2^*$  of 4.4 $\pm$ 0.3 sec<sup>-1</sup> in 26% Ficoll and 4.2s $\pm$ 0.4 sec<sup>-1</sup> in 1% agar solutions. There are no

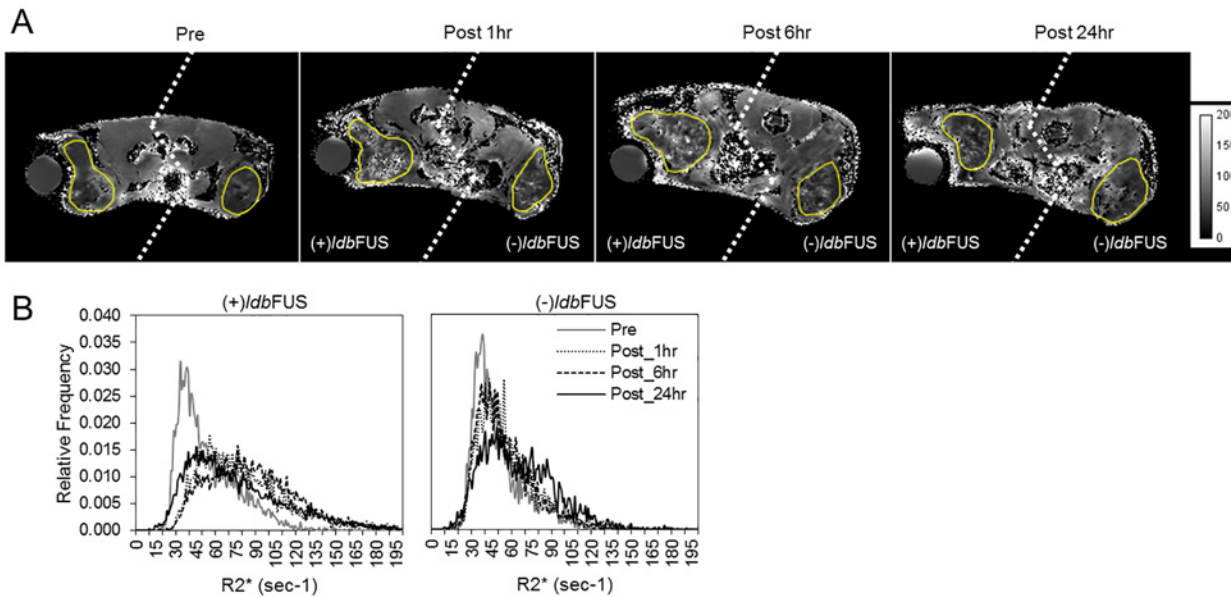

**Fig 3.  $R_2^*$  maps and tumor histograms monitor changes in NK cell concentration.** (A) Representative parametric  $R_2^*$  images (axial slices) of an NSG mouse bearing bilateral flank LS-174T tumors before (pre), 1hr, 6hr, and 24hr post *ldbFUS*/Fe-NK administration. *ldbFUS* was induced at peak rarefaction pressure of 0.50MPa. Yellow outlines show tumor regions of interest. Note that at some imaging time points left and right tumors were not in the same field of view—thus left & right sides (dashed line) may be from slightly different axial slices. Units in  $\text{sec}^{-1}$ . (B) Histogram showing relative frequency  $R_2^*$  distributions of whole tumors from (A). The histogram shifts to increasing values of  $R_2^*$  with time in (+)*ldbFUS* tumor.

doi:10.1371/journal.pone.0142767.g003

significant differences between fitted slopes and intercepts of Fe-NK suspensions in 26% Ficoll and 1% agar solutions.

We performed *ldbFUS* at two pressure levels: 0.25 MPa and 0.50 MPa. In all cases, only one of the bilateral tumors received sonication; the contralateral tumor serving as an internal control. All animals tolerated the *ldbFUS* procedure, the cell injection, and subsequent longitudinal MR imaging without complications. Representative pre and post *ldbFUS*/Fe-NK  $R_2^*$  maps from an NSG mouse that received the higher pressure *ldbFUS* (0.50 MPa) are shown in Fig 3A. Post treatment distributions in the (+)*ldbFUS* tumor region showed increasing values of  $R_2^*$ , as shown in Fig 3B. Fig 4 shows box plots of the  $\Delta R_2^*$  geometric means of each tumor group and control non-tumoral back muscle region. A Kruskal Wallis H test showed that there was a statistically significant difference in  $\Delta R_2^*$  between the four groups ( $p < 0.00001$ ). Post hoc testing showed that  $\Delta R_2^*$  values of (+)*ldbFUS*/0.50MPa tumors were significantly higher than the contralateral (-)*ldbFUS*/0.50MPa tumors at 1 hr ( $p = 0.014$ ), 6 hr ( $p = 0.012$ ), and 24 hr ( $p = 0.013$ ). (+)*ldbFUS*/0.50MPa tumor  $\Delta R_2^*$  values were also significantly higher than the (-)*ldbFUS*/0.25MPa at 1 hr ( $p < 0.01$ ), 6 hr ( $p < 0.01$ ) and 24 hr ( $p = 0.03$ ). (+)*ldbFUS*/0.50MPa tumors were significantly different from (+)*ldbFUS*/0.25MPa in the early 1 hr and 6 hr post times ( $p < 0.01$ ). Use of the higher pressure *ldbFUS*/0.50MPa protocol induced significant increases in  $\Delta R_2^*$  that persisted up to 24 hr post treatment. The control contralateral tumors that did not receive the higher pressure *ldbFUS*/0.50MPa procedure also showed significant increase in  $\Delta R_2^*$  at the 1hr time point compared to the baseline values ( $p < 0.05$ ). No significant differences from pre values were observed in either 0.25 MPa tumor group across time or between groups. Control non-tumoral back muscle  $\Delta R_2^*$  showed no significant changes between pre and post *ldbFUS*/Fe-NK time points, indicating the  $\Delta R_2^*$  was tumor-specific.

Additionally, a subset of the NSG animals that received *ldbFUS*/0.50MPa underwent diffusion weighted imaging to determine changes in apparent diffusion coefficient (ADC), reflective



of increased water content and edema. ADC results showed no significant differences between (-)ldbFUS and (+)ldbFUS tumors across all time points (Fig 5).

Fig 6 illustrates the NK cell concentration ( $10^6/\text{ml}$ , mean $\pm$ SD) in tumors determined from the MRI signal  $\Delta R_2^*$  (using information from the 26% Ficoll  $R_2^*$  vs NK cell concentration curve in Fig 2). Significantly more NK cells per volume of tumor tissue accumulated at the 1 hr, 6 hr, and 24 hr time points in (+)ldbFUS/0.50MPa tumors (1 hr:  $4.18\pm 0.17$ , 6 hr:  $4.65\pm 0.15$ , 24 hr:  $2.78\pm 0.15\ 10^3/\text{mm}^3$ ) than in the control contralateral (-)ldbFUS/0.50MPa tumors (1 hr:  $1.41\pm 0.14$ , 6 hr:  $1.70\pm 0.18$ , 24 hr:  $0.33\pm 0.11\ 10^3/\text{mm}^3$ ) ( $p < 0.01$ , (+)ldbFUS vs (-)ldbFUS). Overtime, the increased number of NK cells that accumulated in the (+)ldbFUS/0.50MPa tumors was statistically significant ( $p < 0.01$ ). The control (-)ldbFUS/0.50MPa tumors also showed NK cell presence only 1 hr and 6 hr after the administration of ldbFUS/Fe-NK. No significant accumulation of NK cells were observed in either (+)ldbFUS/0.25MPa or (-)ldbFUS/0.25MPa tumors.

Following animal euthanasia, histological tumor sections with anti-CD56-HRP and Prussian blue staining showed ferumoxylol labeled NK cells in the spleen and tumor regions (Fig 7). Fig 8A shows representative tumor sections stained with fluorescent anti-CD56 (red) and DAPI (blue) that received ldbFUS/0.50MPa on one tumor (upper panel) and sections from the contralateral control tumor (lower panel) from an NSG mouse. Quantitation of percent NK cells (mean $\pm$ SD, CD56 positive counts per total tumor cell count) showed that (+)ldbFUS/0.50MPa ( $1.21\pm 0.32\%$ ) had significantly higher counts than the (-)ldbFUS/0.50MPa control tumor ( $0.37\pm 0.17\%$ ) (Fig 8C).

We performed another independent measure of NK cell accumulation in tumors after ldbFUS induction. NK cells labeled with CSFE were simultaneously injected with microbubbles during higher power ldbFUS/0.50MPa. A sample section with positive-NK-CSFE staining in tumor tissue is shown in Fig 8B. Quantitation of percent NK cells (mean $\pm$ SD, NK-CSFE positive counts per total tumor cell count) revealed (+)ldbFUS ( $0.59\pm 0.05\%$ ) had a greater number of NK presence than (-)ldbFUS ( $0.35\pm 0.07\%$ ), (Fig 8C,  $p < 0.01$ ).

## Discussion

Tumor accumulation and infiltration of NK cells are crucial for effective NK cell based therapy. Our study shows that administration of ldbFUS onto the tumor mass facilitates accumulation

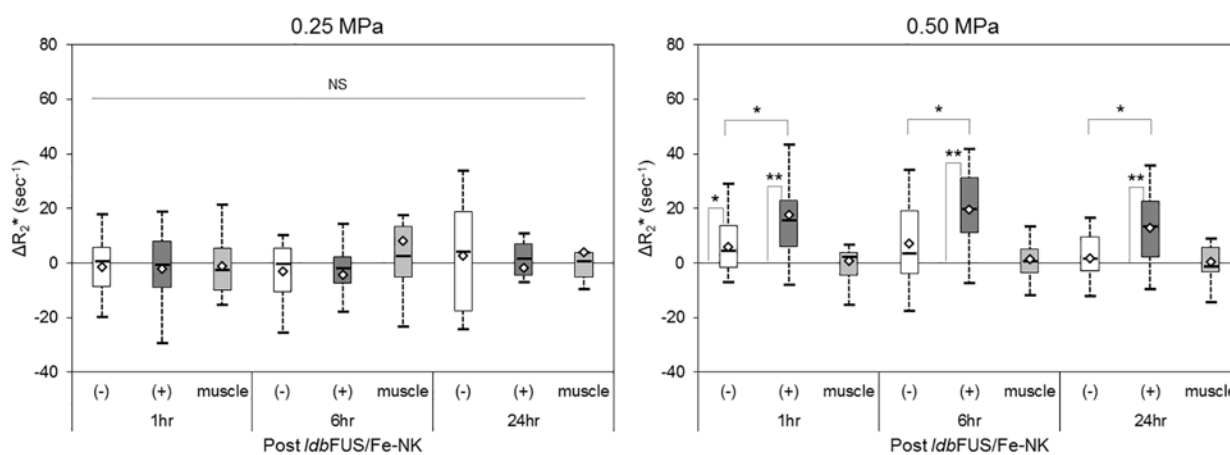

**Fig 4. Boxplots of  $\Delta R_2^*$  for LS-174T tumors without (-) and treated with (+) ldbFUS and non-tumoral back muscle regions in NSG mice that received either low power (0.25MPa, left) or higher power (0.50MPa, right) ldbFUS.** Thick center lines show the medians; box limits indicate the 25th and 75th percentiles as determined by R software; whiskers extend to 1.5 times the interquartile range; diamond-shaped markers represent sample means. A Kruskal Wallis H test showed that there was a statistically significant difference in  $\Delta R_2^*$  between the four groups ( $p < 0.00001$ ). Post hoc comparisons (pre vs. post or (-) vs. (+) ldbFUS) that showed significant differences are indicated by \* $p < 0.05$  and \*\* $p < 0.01$ . NS = no significant difference.

doi:10.1371/journal.pone.0142767.g004

of adoptively transferred NK cells in a human cancer xenograft. LS-174T tumors treated with *ldbFUS* at 0.50MPa had substantial accumulation of NK cells compared to non *ldbFUS* treated tumors, as measured by *in vivo* MRI  $\Delta R_2^*$  increases following administration of ferumoxytol-labeled NK cells. Quantitation of CD56 NK cell marker and of fluorescently labeled NK cells confirmed a consistent 2-fold increase in NK cell accumulation in tumors treated with *ldbFUS* (0.5MPa). In contrast, ferumoxytol-labeled NK cells showed no specific accumulation when tumors were treated with lower power *ldbFUS* (0.25MPa).

Focused ultrasound (FUS) uses acoustic wave propagation to deposit energy in tissue for therapeutic purposes instead of acquiring images. High intensity focused ultrasound (HIFU) is mainly used clinically for thermal ablation of targeted tissue [38, 39], which can result in altering the local immune environment for pro-therapeutic effects. Lower intensity FUS has also been demonstrated to promote drug delivery when paired with microbubbles during FUS (*ldbFUS*), induce immunological responses, and promote homing of various cells (CD8+ cytotoxic T-lymphocytes, dendritic cells, NK cells, neutrophils, and macrophages) [40–44].

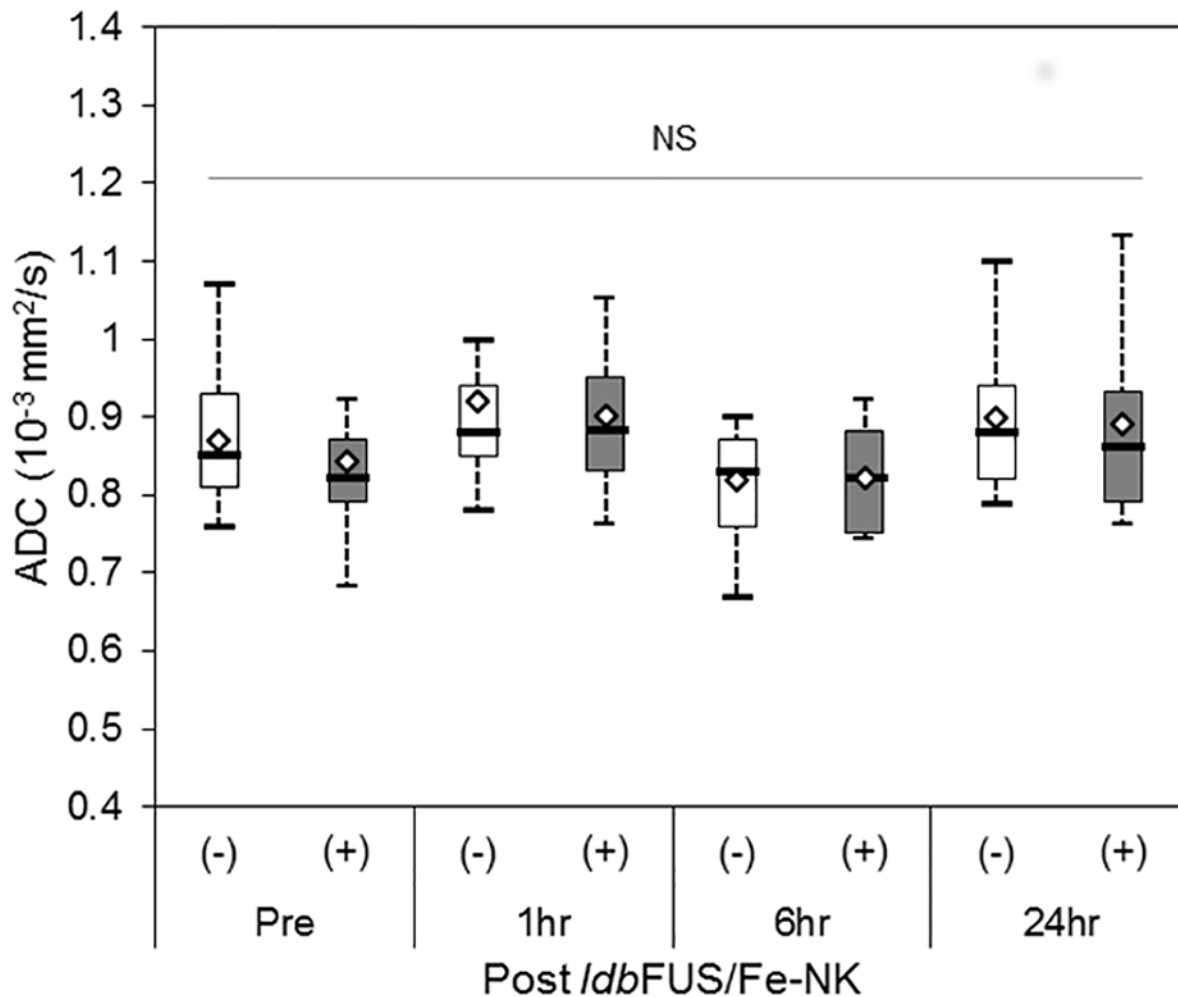

**Fig 5. Boxplots of Apparent Diffusion Coefficient (ADC) values for a subset of LS-174T tumors (n = 12) without (-) and treated with (+) *ldbFUS*/0.50MPa in NSG mice.** Thick center lines show the medians; box limits indicate the 25th and 75th percentiles as determined by R software; whiskers extend to 1.5 times the interquartile range; diamond-shaped markers represent sample means. There were no significant changes in ADC values between *ldbFUS* treated and non treated tumors and across time points.

doi:10.1371/journal.pone.0142767.g005

Furthermore, microbubbles undergoing stable cavitation can produce fluid shear stresses that can induce pro-extravasation of activated leukocytes *in vitro* (increased adhesion, deformability, motility, and transmigration) [10]. Interestingly, we observed increased  $\Delta R_2^*$  signal in the non-*ldbFUS* tumor from animals that received *ldbFUS* on the ipsilateral tumor at higher power, compared to animals that received the lower power ultrasound. Thus, with sufficient power, *ldbFUS* can have both a local and systemic effect that is tumor-specific. Power and length of application of *ldbFUS*, as well as relative timing of introduction of NK cells, are all variables that influence the relative (as well as absolute) importance of the local and systemic effects. We note that Alkins *et al.* showed that injection of NK-92 cells immediately prior to BBB disruption resulted in optimal translocation of HER2 specific NK-92 cells to HER2 expressing breast metastasis [10].

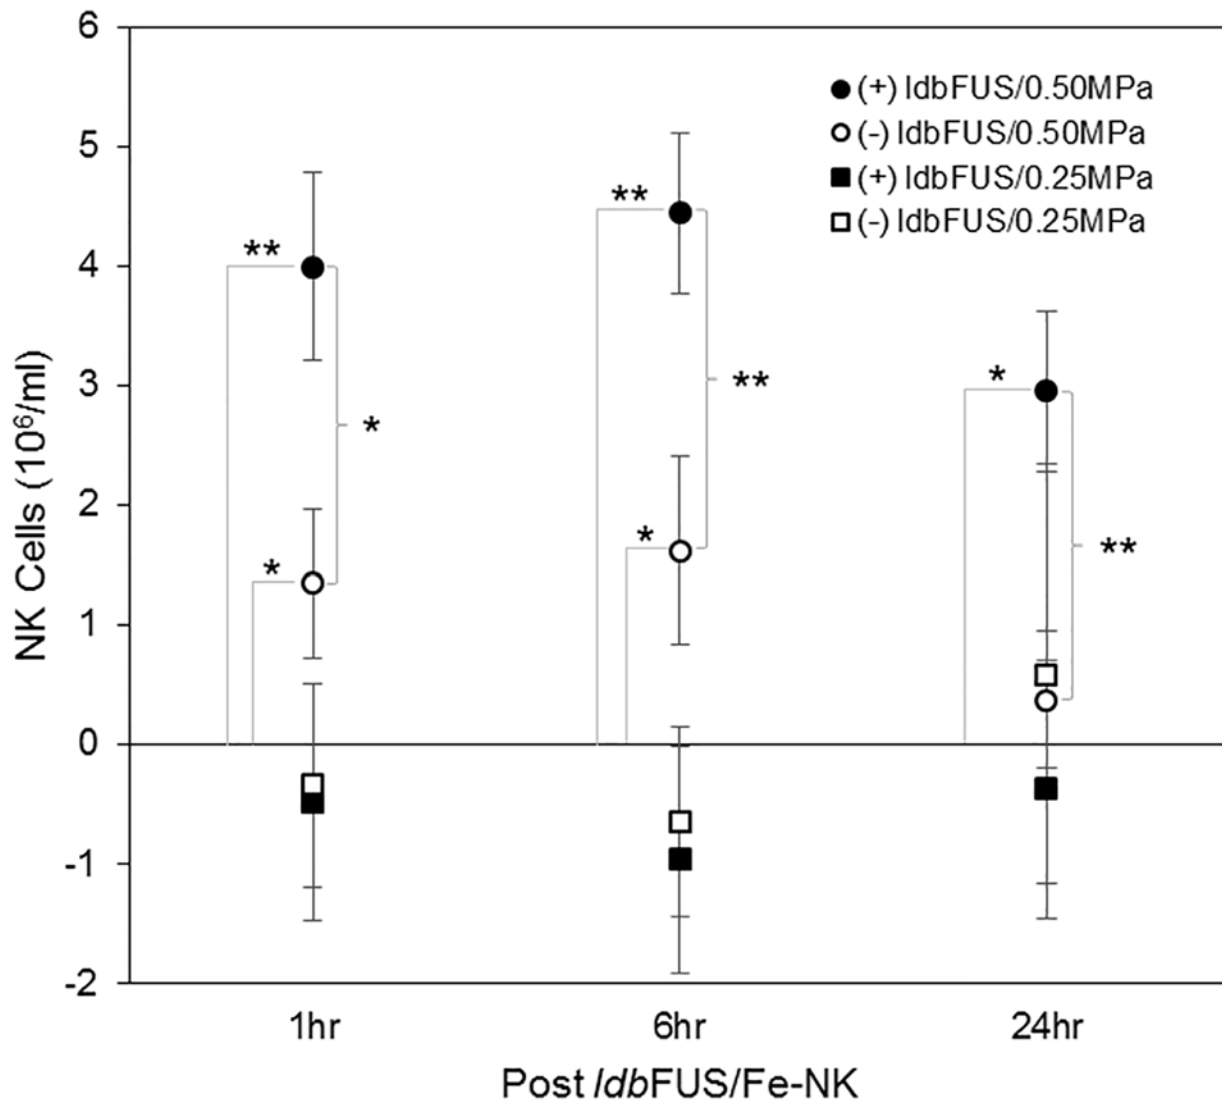

**Fig 6. NK cell concentration in tumors determined from  $\Delta R_2^*$ .** Although NK cell tumor distributions are heterogeneous as seen in Fig 3,  $R_2^*$  geometric means were obtained by fitting the  $R_2^*$  histogram to a lognormal distribution. NK cell concentrations ( $10^6/\text{ml}$ , mean $\pm$ SD) in tumor tissue obtained from  $\Delta R_2^*$  determination and the linear relationship between  $R_2^*$  and NK cell concentration shown in Fig 2. Planned comparisons were performed using the Student's t-test. Significant differences are indicated by \* $p < 0.05$  and \*\* $p < 0.01$ .

doi:10.1371/journal.pone.0142767.g006

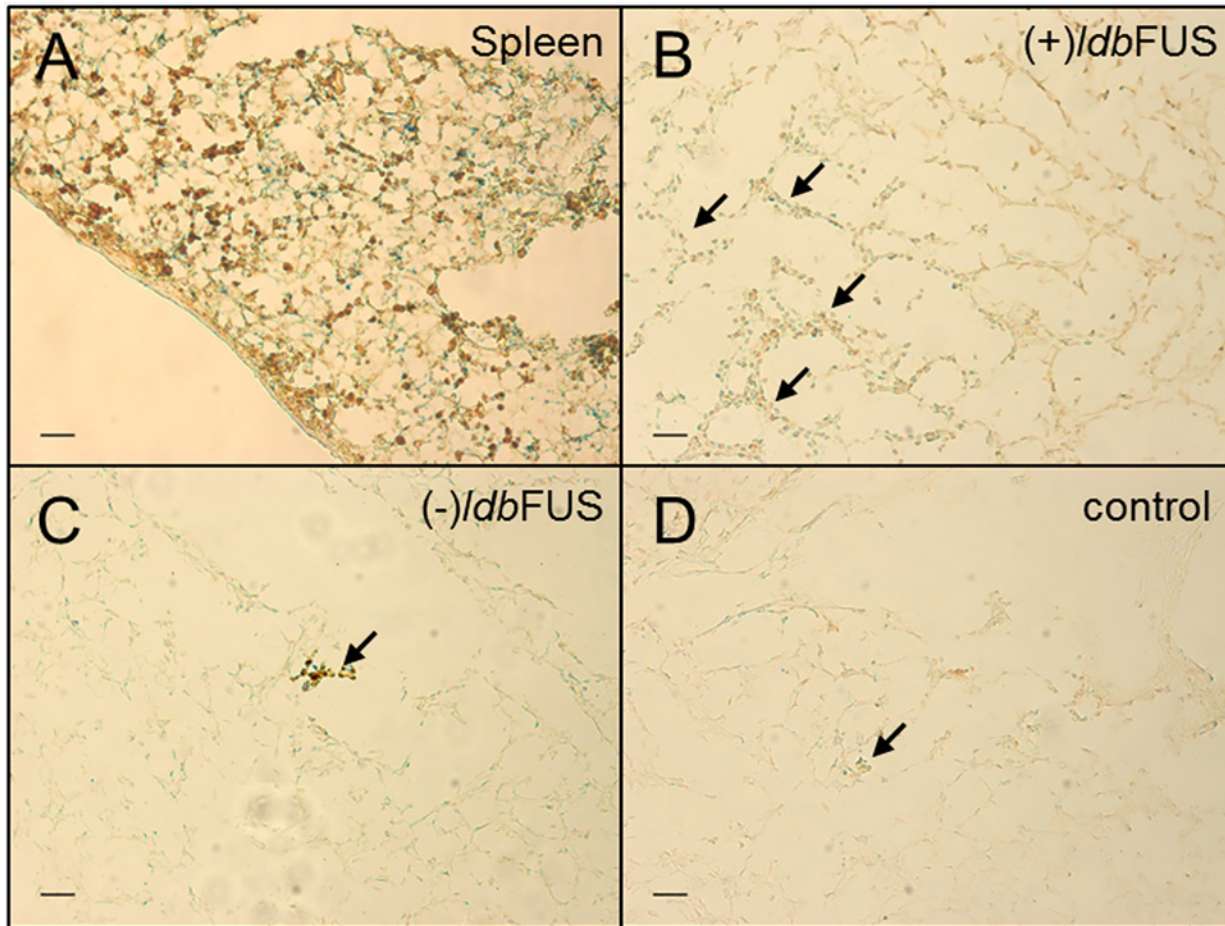

**Fig 7. Anti-CD56-HRP plus Prussian Blue staining of spleen and tumor regions show accumulation of NK cells.** Spleen (A) and tumor regions (B, C) are from an NSG mouse. (B) Tumor region receiving *ldbFUS* (0.5MPa) and (C) tumor contralateral to B. (D) Tumor region from an NSG that received no *ldbFUS* treatment. Scale bar = 50  $\mu$ m. Arrows show greater number of colocalization of positive CD56 (brown) and positive iron (blue) staining from *ldbFUS* administered tumor than tumors without treatment.

doi:10.1371/journal.pone.0142767.g007

The use of ferumoxytol, a US FDA-approved iron supplement for iron deficiency in patients with chronic kidney disease, as a cell labeling agent supports ready clinical translation of non-invasive measurements of early tumor response to treatment using MRI. As a proof of concept, *in vivo* cell tracking using ferumoxytol has been demonstrated using adipose-derived stem cells implantation in osterchondral defects of arthritic joints with MRI [45]. The quantitative approach of generating relaxation rate maps to measure concentrations of cells has also been demonstrated by Sheu *et al.*, who tracked super paramagnetic iron oxide (SPIO) labeled NK cells in hepatocellular carcinoma rats [46].

NK cells used in this study were of human origin and activated using rhIL-2 during expansion *in vitro* prior to adoptive transfer. Single doses of IVIG and ICK (M5A-IL-2) were administered prior to the adoptive transfer of NK cells in order to promote additional homing and activation of NK cells. Since NSG mice lack circulating IgG, IVIG was used to block neonatal Fc receptor (FcRn) clearance of the administered ICK via Fc:FcRn interaction and improve the circulating half-life of the ICK [47]. The M5A antibody portion of the ICK binds to the tumor associated carcinoembryonic (CEA) antigens of the LS-174T cells [48], which in turn are recognized by NK cell CD16 (Fc $\gamma$ IIIR) receptors [49]. The IL-2 cytokine portion may further provide



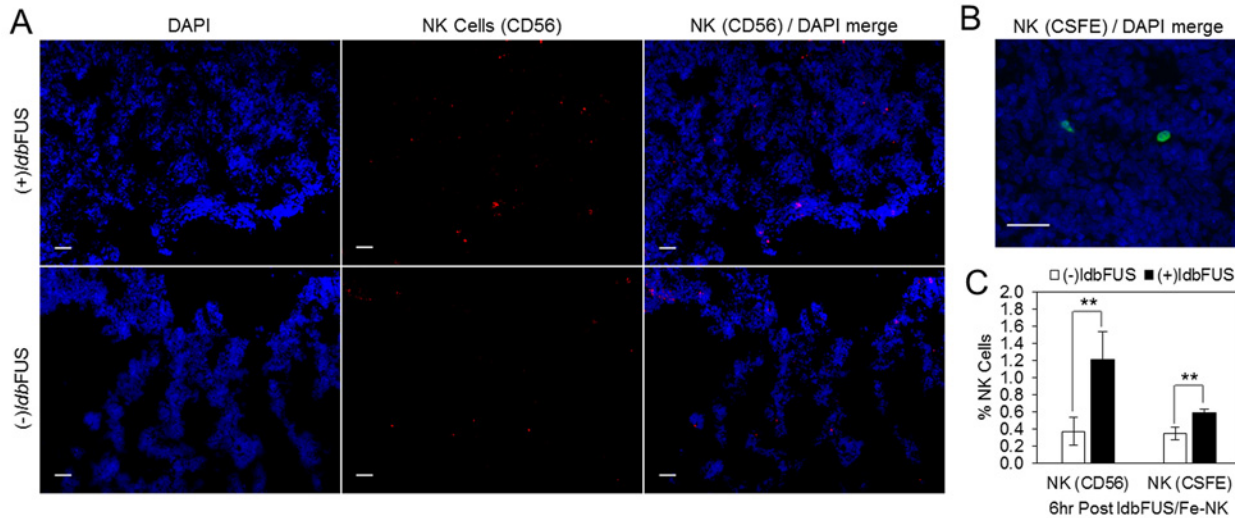

**Fig 8. Quantitation of % NK cells from fluorescent staining of tumors from an NSG mouse.** (A) Fluorescent NK cells (CD56, red) and DAPI (blue) staining of tumors from an NSG mouse: upper panel from tumor administered *ldbFUS*/0.50 MPa; lower panel from contralateral tumor that was not treated. Scale bar = 50  $\mu$ m. (B) A sample section with positive-NK-CSFE (green) in tumor tissue (DAPI, blue). Scale bar = 50  $\mu$ m. (C) Mean $\pm$ SD Percent % NK cells determined from CD56 and CSFE fluorescent staining. % NK cells = number of NK cells / total number of cells (determined from DAPI stain). Planned comparisons using t-test showed a significant difference between (-)*ldbFUS* and (+)*ldbFUS*, \*\* $p < 0.01$ .

doi:10.1371/journal.pone.0142767.g008

a costimulatory adjuvant signal for enhancing NK cell mediated antitumor response [28]. The level and frequency of this IVIG/ICK regimen that could result in optimal tumor trafficking of NK cells is under further investigation.

There are several methods to potentiate the killing activity of NK cells. KIR mismatch between allogeneic NK cells and host tumor cells can enhance tumor-killing ability of NK cells through the “missing-self” recognition process [12, 13]. Genetic engineering of NK cells either allogeneically isolated or from cytotoxic NK cell lines adds a layer of optimization for enhanced tumor homing and killing [9]. Activation of NK cells is influenced by the balance of the inhibitory and activating receptors present on the surface of the cells. Activation can be potentiated through down-regulating the inhibitory receptors or overexpressing the activating NK cell receptors using small interfering RNA-based technologies [50, 51]. Genetic transfer of chimeric tumor-antigen-specific receptors on NK cells also enhances targeting of these cells [10, 31, 52]. Combining these techniques for enhancing NK cell activity with optimized immunocytokine regimen and *ldbFUS* induction would be a step towards successful multimodal immunotherapy.

We have demonstrated that NK cells homing to tumor regions can be potentiated by direct induction of *ldbFUS* onto the tumor mass and can be evaluated non-invasively using MRI. NK cells are already used clinically, MRI guided focused ultrasound [53] is approved for treatment of uterine fibroids and is in trials for treatment of several cancers, and several microbubble agents are approved for ultrasound imaging applications; thus all methods used in this study are currently in use clinically in some form, demonstrating the practical feasibility of translation into the clinic.

## Supporting Information

**S1 Dataset. Apparent Diffusion Coefficient Data.**  
(XLSX)



**S2 Dataset.  $\Delta R_2^*$  Data for *ldbFUS/0.25MPa* Group.**  
(XLSX)

**S3 Dataset.  $\Delta R_2^*$  Data for *ldbFUS/0.50MPa* Group.**  
(XLSX)

**S4 Dataset. Data for Histological Quantification of % NK Cell Counts.**  
(XLSX)

**S5 Dataset.  $R_2^*$  versus Fe-NK Cell Concentration Data.**  
(XLSX)

**S1 Fig. Sample Positive-Anti-CD-56 Staining.**  
(TIF)

**S2 Fig. Sample DAPI Staining.**  
(TIF)

**S3 Fig. Sample Merged Image of Positive-Anti-CD-56 and DAPI Staining.**  
(TIF)

## Acknowledgments

The authors acknowledge the contributions of Sharon Lin for invaluable assistance with animal and cell based work, of Xiaowei Zhang and Thomas Ng for MRI expertise. The authors would also like to thank Desiree Crow, Junie Chea, Sarah McCaig, Xui-Li Li, Jianyi Wang, Anakim Sherman, Kofi Poku and Mark Sherman from City of Hope, for excellent contributions with NK cell generation and expansion, tumor induction, and constructing the immunocytokine product. Also the authors would like to thank Nathan Dalleska, from the Caltech Environmental Analysis Center, for his help collecting the ICP-MS data.

## Author Contributions

Conceived and designed the experiments: REJ AAR DC NSSM. Performed the experiments: NSSM SRB MW REJ. Analyzed the data: NSSM SRB MW REJ. Contributed reagents/materials/analysis tools: DC AAR REJ. Wrote the paper: NSSM SRB MW DC AAR REJ.

## References

1. Vivier E, Raulet DH, Moretta A, Caligiuri MA, Zitvogel L, Lanier LL, et al. Innate or adaptive immunity? The example of natural killer cells. *Science*. 2011; 331(6013):44–9. doi: [10.1126/science.1198687](https://doi.org/10.1126/science.1198687) PMID: [21212348](https://pubmed.ncbi.nlm.nih.gov/21212348/); PubMed Central PMCID: PMC3089969.
2. Kiessling R, Klein E, Pross H, Wigzell H. "Natural" killer cells in the mouse. II. Cytotoxic cells with specificity for mouse Moloney leukemia cells. Characteristics of the killer cell. *European journal of immunology*. 1975; 5(2):117–21. doi: [10.1002/eji.1830050209](https://doi.org/10.1002/eji.1830050209) PMID: [1086218](https://pubmed.ncbi.nlm.nih.gov/1086218/).
3. Cheng M, Chen Y, Xiao W, Sun R, Tian Z. NK cell-based immunotherapy for malignant diseases. *Cellular & molecular immunology*. 2013; 10(3):230–52. doi: [10.1038/cmi.2013.10](https://doi.org/10.1038/cmi.2013.10) PMID: [23604045](https://pubmed.ncbi.nlm.nih.gov/23604045/).
4. Cooper MA, Fehniger TA, Caligiuri MA. The biology of human natural killer-cell subsets. *Trends in immunology*. 2001; 22(11):633–40. PMID: [11698225](https://pubmed.ncbi.nlm.nih.gov/11698225/).
5. Alderson KL, Sondel PM. Clinical cancer therapy by NK cells via antibody-dependent cell-mediated cytotoxicity. *Journal of biomedicine & biotechnology*. 2011; 2011:379123. doi: [10.1155/2011/379123](https://doi.org/10.1155/2011/379123) PMID: [21660134](https://pubmed.ncbi.nlm.nih.gov/21660134/); PubMed Central PMCID: PMC3110303.
6. Dall'Ozzo S, Tartas S, Pintaud G, Cartron G, Colombat P, Bardos P, et al. Rituximab-dependent cytotoxicity by natural killer cells: influence of FCGR3A polymorphism on the concentration-effect relationship. *Cancer research*. 2004; 64(13):4664–9. doi: [10.1158/0008-5472.CAN-03-2862](https://doi.org/10.1158/0008-5472.CAN-03-2862) PMID: [15231679](https://pubmed.ncbi.nlm.nih.gov/15231679/).

7. Gillies SD, Lan Y, Williams S, Carr F, Forman S, Raubitschek A, et al. An anti-CD20-IL-2 immunocytokine is highly efficacious in a SCID mouse model of established human B lymphoma. *Blood*. 2005; 105(10):3972–8. doi: [10.1182/blood-2004-09-3533](https://doi.org/10.1182/blood-2004-09-3533) PMID: [15692062](https://pubmed.ncbi.nlm.nih.gov/15692062/).
8. Ames E, Murphy WJ. Advantages and clinical applications of natural killer cells in cancer immunotherapy. *Cancer immunology, immunotherapy: CII*. 2013. doi: [10.1007/s00262-013-1469-8](https://doi.org/10.1007/s00262-013-1469-8) PMID: [23989217](https://pubmed.ncbi.nlm.nih.gov/23989217/).
9. Sta Maria NS, Barnes SR, Jacobs RE. In vivo monitoring of natural killer cell trafficking during tumor immunotherapy. *Magnetic resonance insights*. 2014; 7:15–21. doi: [10.4137/MRI.S13145](https://doi.org/10.4137/MRI.S13145) PMID: [25114550](https://pubmed.ncbi.nlm.nih.gov/25114550/); PubMed Central PMCID: PMC4122546.
10. Alkins R, Burgess A, Ganguly M, Francia G, Kerbel R, Wels WS, et al. Focused ultrasound delivers targeted immune cells to metastatic brain tumors. *Cancer research*. 2013; 73(6):1892–9. doi: [10.1158/0008-5472.CAN-12-2609](https://doi.org/10.1158/0008-5472.CAN-12-2609) PMID: [23302230](https://pubmed.ncbi.nlm.nih.gov/23302230/); PubMed Central PMCID: PMC3607446.
11. Somanchi SS, Senyukov VV, Denman CJ, Lee DA. Expansion, purification, and functional assessment of human peripheral blood NK cells. *Journal of visualized experiments: JoVE*. 2011;(48: ). doi: [10.3791/2540](https://doi.org/10.3791/2540) PMID: [21339714](https://pubmed.ncbi.nlm.nih.gov/21339714/); PubMed Central PMCID: PMC3180743.
12. Miller JS, Soignier Y, Panoskaltis-Mortari A, McNearney SA, Yun GH, Fautsch SK, et al. Successful adoptive transfer and in vivo expansion of human haploidentical NK cells in patients with cancer. *Blood*. 2005; 105(8):3051–7. doi: [10.1182/blood-2004-07-2974](https://doi.org/10.1182/blood-2004-07-2974) PMID: [15632206](https://pubmed.ncbi.nlm.nih.gov/15632206/).
13. Ruggeri L, Mancusi A, Capanni M, Martelli MF, Velardi A. Exploitation of alloreactive NK cells in adoptive immunotherapy of cancer. *Current opinion in immunology*. 2005; 17(2):211–7. doi: [10.1016/j.coi.2005.01.007](https://doi.org/10.1016/j.coi.2005.01.007) PMID: [15766683](https://pubmed.ncbi.nlm.nih.gov/15766683/).
14. Cheng M, Zhang J, Jiang W, Chen Y, Tian Z. Natural killer cell lines in tumor immunotherapy. *Frontiers of medicine*. 2012; 6(1):56–66. doi: [10.1007/s11684-012-0177-7](https://doi.org/10.1007/s11684-012-0177-7) PMID: [22460449](https://pubmed.ncbi.nlm.nih.gov/22460449/).
15. Liu HL, Hsieh HY, Lu LA, Kang CW, Wu MF, Lin CY. Low-pressure pulsed focused ultrasound with microbubbles promotes an anticancer immunological response. *Journal of translational medicine*. 2012; 10:221. Epub 2012/11/13. doi: [10.1186/1479-5876-10-221](https://doi.org/10.1186/1479-5876-10-221) PMID: [23140567](https://pubmed.ncbi.nlm.nih.gov/23140567/); PubMed Central PMCID: PMC3543346.
16. Vlachos F, Tung YS, Konofagou E. Permeability dependence study of the focused ultrasound-induced blood-brain barrier opening at distinct pressures and microbubble diameters using DCE-MRI. *Magnetic resonance in medicine: official journal of the Society of Magnetic Resonance in Medicine / Society of Magnetic Resonance in Medicine*. 2011; 66(3):821–30. doi: [10.1002/mrm.22848](https://doi.org/10.1002/mrm.22848) PMID: [21465543](https://pubmed.ncbi.nlm.nih.gov/21465543/); PubMed Central PMCID: PMC3919956.
17. Vestweber D. Relevance of endothelial junctions in leukocyte extravasation and vascular permeability. *Annals of the New York Academy of Sciences*. 2012; 1257:184–92. Epub 2012/06/08. doi: [10.1111/j.1749-6632.2012.06558.x](https://doi.org/10.1111/j.1749-6632.2012.06558.x) PMID: [22671605](https://pubmed.ncbi.nlm.nih.gov/22671605/).
18. Park J, Zhang Y, Vykhodtseva N, Jolesz FA, McDannold NJ. The kinetics of blood brain barrier permeability and targeted doxorubicin delivery into brain induced by focused ultrasound. *Journal of controlled release: official journal of the Controlled Release Society*. 2012; 162(1):134–42. Epub 2012/06/20. doi: [10.1016/j.jconrel.2012.06.012](https://doi.org/10.1016/j.jconrel.2012.06.012) PMID: [22709590](https://pubmed.ncbi.nlm.nih.gov/22709590/); PubMed Central PMCID: PMC3520430.
19. Nhan T, Burgess A, Cho EE, Stefanovic B, Lilje L, Hynynen K. Drug delivery to the brain by focused ultrasound induced blood-brain barrier disruption: Quantitative evaluation of enhanced permeability of cerebral vasculature using two-photon microscopy. *Journal of controlled release: official journal of the Controlled Release Society*. 2013; 172(1):274–80. Epub 2013/09/07. doi: [10.1016/j.jconrel.2013.08.029](https://doi.org/10.1016/j.jconrel.2013.08.029) PMID: [24008151](https://pubmed.ncbi.nlm.nih.gov/24008151/).
20. Sun T, Samiotaki G, Konofagou EE. Prediction of the reversibility of the ultrasound-induced blood-brain barrier opening using passive cavitation detection with magnetic resonance imaging validation. *The Journal of the Acoustical Society of America*. 2013; 134(5):4183. Epub 2013/11/05. doi: [10.1121/1.4831336](https://doi.org/10.1121/1.4831336) PMID: [24181668](https://pubmed.ncbi.nlm.nih.gov/24181668/).
21. Konofagou EE. Optimization of the ultrasound-induced blood-brain barrier opening. *Theranostics*. 2012; 2(12):1223–37. Epub 2013/02/06. doi: [10.7150/thno.5576](https://doi.org/10.7150/thno.5576) PMID: [23382778](https://pubmed.ncbi.nlm.nih.gov/23382778/); PubMed Central PMCID: PMC3563154.
22. Samiotaki G, Vlachos F, Tung YS, Konofagou EE. A quantitative pressure and microbubble-size dependence study of focused ultrasound-induced blood-brain barrier opening reversibility in vivo using MRI. *Magnetic resonance in medicine: official journal of the Society of Magnetic Resonance in Medicine / Society of Magnetic Resonance in Medicine*. 2012; 67(3):769–77. Epub 2011/08/23. doi: [10.1002/mrm.23063](https://doi.org/10.1002/mrm.23063) PMID: [21858862](https://pubmed.ncbi.nlm.nih.gov/21858862/); PubMed Central PMCID: PMC3658823.
23. O'Reilly MA, Waspe AC, Chopra R, Hynynen K. MRI-guided disruption of the blood-brain barrier using transcranial focused ultrasound in a rat model. *Journal of visualized experiments: JoVE*. 2012;(61: ). Epub 2012/03/22. doi: [10.3791/3555](https://doi.org/10.3791/3555) PMID: [22433937](https://pubmed.ncbi.nlm.nih.gov/22433937/).

24. Chopra R, Vykhodtseva N, Hynynen K. Influence of exposure time and pressure amplitude on blood-brain-barrier opening using transcranial ultrasound exposures. *ACS Chem Neurosci*. 2010; 1(5):391–8. Epub 2010/06/22. doi: [10.1021/cn9000445](https://doi.org/10.1021/cn9000445) PMID: [20563295](https://pubmed.ncbi.nlm.nih.gov/20563295/); PubMed Central PMCID: PMC2885821.
25. McDannold N, Arvanitis CD, Vykhodtseva N, Livingstone MS. Temporary disruption of the blood-brain barrier by use of ultrasound and microbubbles: safety and efficacy evaluation in rhesus macaques. *Cancer research*. 2012; 72(14):3652–63. Epub 2012/05/04. doi: [10.1158/0008-5472.can-12-0128](https://doi.org/10.1158/0008-5472.can-12-0128) PMID: [22552291](https://pubmed.ncbi.nlm.nih.gov/22552291/); PubMed Central PMCID: PMC3533365.
26. Wang S, Samiotaki G, Olumolade O, Feshitan JA, Konofagou EE. Microbubble type and distribution dependence of focused ultrasound-induced blood-brain barrier opening. *Ultrasound in medicine & biology*. 2014; 40(1):130–7. Epub 2013/11/19. doi: [10.1016/j.ultrasmedbio.2013.09.015](https://doi.org/10.1016/j.ultrasmedbio.2013.09.015) PMID: [24239362](https://pubmed.ncbi.nlm.nih.gov/24239362/); PubMed Central PMCID: PMC3893303.
27. Lu P, Zhu XQ, Xu ZL, Zhou Q, Zhang J, Wu F. Increased infiltration of activated tumor-infiltrating lymphocytes after high intensity focused ultrasound ablation of human breast cancer. *Surgery*. 2009; 145(3):286–93. doi: [10.1016/j.surg.2008.10.010](https://doi.org/10.1016/j.surg.2008.10.010) PMID: [19231581](https://pubmed.ncbi.nlm.nih.gov/19231581/).
28. Lode HN, Xiang R, Becker JC, Gillies SD, Reisfeld RA. Immunocytokines: a promising approach to cancer immunotherapy. *Pharmacology & therapeutics*. 1998; 80(3):277–92. Epub 1999/01/15. PMID: [9888698](https://pubmed.ncbi.nlm.nih.gov/9888698/).
29. Miller JS. Therapeutic applications: natural killer cells in the clinic. *ASH Education Program Book*. 2013; 2013(1):247–53.
30. Galli F, Histed SN, Aras O. NK cell imaging by in vitro and in vivo labelling approaches. *Quarterly Journal of Nuclear Medicine and Molecular Imaging*. 2014; 58:276–83. PMID: [25265248](https://pubmed.ncbi.nlm.nih.gov/25265248/)
31. Daldrup-Link HE, Meier R, Rudelius M, Piontek G, Piert M, Metz S, et al. In vivo tracking of genetically engineered, anti-HER2/neu directed natural killer cells to HER2/neu positive mammary tumors with magnetic resonance imaging. *European radiology*. 2005; 15(1):4–13. doi: [10.1007/s00330-004-2526-7](https://doi.org/10.1007/s00330-004-2526-7) PMID: [15616814](https://pubmed.ncbi.nlm.nih.gov/15616814/).
32. Jha P, Golovko D, Bains S, Hostetter D, Meier R, Wendland MF, et al. Monitoring of natural killer cell immunotherapy using noninvasive imaging modalities. *Cancer research*. 2010; 70(15):6109–13. doi: [10.1158/0008-5472.CAN-09-3774](https://doi.org/10.1158/0008-5472.CAN-09-3774) PMID: [20631071](https://pubmed.ncbi.nlm.nih.gov/20631071/); PubMed Central PMCID: PMC2917347.
33. Chenevert TL, Meyer CR, Moffat BA, Rehemtulla A, Mukherji SK, Gebarski SS, et al. Diffusion MRI: a new strategy for assessment of cancer therapeutic efficacy. *Molecular imaging*. 2002; 1(4):336–43. PMID: [12926229](https://pubmed.ncbi.nlm.nih.gov/12926229/)
34. Hamstra DA, Chenevert TL, Moffat BA, Johnson TD, Meyer CR, Mukherji SK, et al. Evaluation of the functional diffusion map as an early biomarker of time-to-progression and overall survival in high-grade glioma. *Proceedings of the National Academy of Sciences of the United States of America*. 2005; 102(46):16759–64. doi: [10.1073/pnas.0508347102](https://doi.org/10.1073/pnas.0508347102) PMID: [16267128](https://pubmed.ncbi.nlm.nih.gov/16267128/); PubMed Central PMCID: PMC1276616.
35. Lazovic J, Jensen MC, Ferkassian E, Aguilar B, Raubitschek A, Jacobs RE. Imaging immune response in vivo: cytolytic action of genetically altered T cells directed to glioblastoma multiforme. *Clinical cancer research: an official journal of the American Association for Cancer Research*. 2008; 14(12):3832–9. doi: [10.1158/1078-0432.CCR-07-5067](https://doi.org/10.1158/1078-0432.CCR-07-5067) PMID: [18559603](https://pubmed.ncbi.nlm.nih.gov/18559603/); PubMed Central PMCID: PMC2737486.
36. Barnes SR, Ng TS, Santa-Maria N, Montagne A, Zlokovic BV, Jacobs RE. ROCKETSHIP: a flexible and modular software tool for the planning, processing and analysis of dynamic MRI studies. *BMC Med Imaging*. 2015; 15:19. doi: [10.1186/s12880-015-0062-3](https://doi.org/10.1186/s12880-015-0062-3) PMID: [26076957](https://pubmed.ncbi.nlm.nih.gov/26076957/); PubMed Central PMCID: PMC4466867.
37. Arct J, Pytkowska K. Flavonoids as components of biologically active cosmeceuticals. *Clinics in dermatology*. 2008; 26(4):347–57. doi: [10.1016/j.clindermatol.2008.01.004](https://doi.org/10.1016/j.clindermatol.2008.01.004) PMID: [18691514](https://pubmed.ncbi.nlm.nih.gov/18691514/).
38. Orsi F, Arnone P, Chen W, Zhang L. High intensity focused ultrasound ablation: a new therapeutic option for solid tumors. *Journal of cancer research and therapeutics*. 2010; 6(4):414–20. Epub 2011/03/02. doi: [10.4103/0973-1482.77064](https://doi.org/10.4103/0973-1482.77064) PMID: [21358073](https://pubmed.ncbi.nlm.nih.gov/21358073/).
39. Al-Bataineh O, Jenne J, Huber P. Clinical and future applications of high intensity focused ultrasound in cancer. *Cancer treatment reviews*. 2012; 38(5):346–53. Epub 2011/09/20. doi: [10.1016/j.ctrv.2011.08.004](https://doi.org/10.1016/j.ctrv.2011.08.004) PMID: [21924838](https://pubmed.ncbi.nlm.nih.gov/21924838/).
40. Chen P-Y, Liu H-L, Hua M-Y, Yang H-W, Huang C-Y, Chu P-C, et al. Novel magnetic/ultrasound focusing system enhances nanoparticle drug delivery for glioma treatment. *Neuro-Oncology*. 2010; 12(10):1050–60. doi: [10.1093/neuonc/noq054](https://doi.org/10.1093/neuonc/noq054) PMID: [20663792](https://pubmed.ncbi.nlm.nih.gov/20663792/)
41. Kiessling F, Fokong S, Koczera P, Lederle W, Lammers T. Ultrasound microbubbles for molecular diagnosis, therapy, and theranostics. *J Nucl Med*. 2012; 53(3):345–8. Epub 2012/03/07. doi: [10.2967/jnumed.111.099754](https://doi.org/10.2967/jnumed.111.099754) PMID: [22393225](https://pubmed.ncbi.nlm.nih.gov/22393225/).

42. Kinoshita M, McDannold N, Jolesz FA, Hynynen K. Noninvasive localized delivery of Herceptin to the mouse brain by MRI-guided focused ultrasound-induced blood-brain barrier disruption. *Proceedings of the National Academy of Sciences*. 2006; 103(31):11719–23. doi: [10.1073/pnas.0604318103](https://doi.org/10.1073/pnas.0604318103)
43. Treat LH, McDannold N, Vykhodtseva N, Zhang Y, Tam K, Hynynen K. Targeted delivery of doxorubicin to the rat brain at therapeutic levels using MRI-guided focused ultrasound. *International Journal of Cancer*. 2007; 121(4):901–7.
44. Watson KD, Lai C-Y, Qin S, Kruse DE, Lin Y-C, Seo JW, et al. Ultrasound Increases Nanoparticle Delivery by Reducing Intratumoral Pressure and Increasing Transport in Epithelial and Epithelial-Mesenchymal Transition Tumors. *Cancer research*. 2012; 72(6):1485–93. doi: [10.1158/0008-5472.CAN-11-3232](https://doi.org/10.1158/0008-5472.CAN-11-3232) PMID: [22282664](https://pubmed.ncbi.nlm.nih.gov/22282664/)
45. Khurana A, Nejadnik H, Chapelin F, Lenkov O, Gawande R, Lee S, et al. Ferumoxytol: a new, clinically applicable label for stem-cell tracking in arthritic joints with MRI. *Nanomedicine*. 2013. doi: [10.2217/nnm.12.198](https://doi.org/10.2217/nnm.12.198) PMID: [23534832](https://pubmed.ncbi.nlm.nih.gov/23534832/); PubMed Central PMCID: PMC3816126.
46. Sheu AY, Zhang Z, Omary RA, Larson AC. MRI-monitored transcatheter intra-arterial delivery of SPIO-labeled natural killer cells to hepatocellular carcinoma: preclinical studies in a rodent model. *Investigative radiology*. 2013; 48(6):492–9. doi: [10.1097/RLI.0b013e31827994e5](https://doi.org/10.1097/RLI.0b013e31827994e5) PMID: [23249649](https://pubmed.ncbi.nlm.nih.gov/23249649/); PubMed Central PMCID: PMC3644319.
47. Kuo TT, Aveson VG. Neonatal Fc receptor and IgG-based therapeutics. *MAbs*. 2011; 3(5):422–30. doi: [10.4161/mabs.3.5.16983](https://doi.org/10.4161/mabs.3.5.16983) PMID: [22048693](https://pubmed.ncbi.nlm.nih.gov/22048693/); PubMed Central PMCID: PMC3225846.
48. Yazaki PJ, Sherman MA, Shively JE, Ikle D, Williams LE, Wong JY, et al. Humanization of the anti-CEA T84.66 antibody based on crystal structure data. *Protein Eng Des Sel*. 2004; 17(5):481–9. doi: [10.1093/protein/gzh056](https://doi.org/10.1093/protein/gzh056) PMID: [15316127](https://pubmed.ncbi.nlm.nih.gov/15316127/).
49. Clynes RA, Towers TL, Presta LG, Ravetch JV. Inhibitory Fc receptors modulate *in vivo* cytotoxicity against tumor targets. *Nature medicine*. 2000; 6(4):443–6. PMID: [10742152](https://pubmed.ncbi.nlm.nih.gov/10742152/)
50. Talebian L, Fischer DA, Wu J, Channon JY, Sentman CL, Ernstoff MS, et al. The natural killer-activating receptor, NKG2D, on CD3+CD8+ T cells plays a critical role in identifying and killing autologous myeloma cells. *Transfusion*. 2014. doi: [10.1111/trf.12517](https://doi.org/10.1111/trf.12517) PMID: [24446786](https://pubmed.ncbi.nlm.nih.gov/24446786/).
51. Figueiredo C, Seltsam A, Blasczyk R. Permanent silencing of NKG2A expression for cell-based therapeutics. *Journal of molecular medicine*. 2009; 87(2):199–210. doi: [10.1007/s00109-008-0417-0](https://doi.org/10.1007/s00109-008-0417-0) PMID: [19002424](https://pubmed.ncbi.nlm.nih.gov/19002424/).
52. Muller T, Uherek C, Maki G, Chow KU, Schimpf A, Klingemann HG, et al. Expression of a CD20-specific chimeric antigen receptor enhances cytotoxic activity of NK cells and overcomes NK-resistance of lymphoma and leukemia cells. *Cancer immunology, immunotherapy: CII*. 2008; 57(3):411–23. doi: [10.1007/s00262-007-0383-3](https://doi.org/10.1007/s00262-007-0383-3) PMID: [17717662](https://pubmed.ncbi.nlm.nih.gov/17717662/)
53. Jolesz FA. MRI-guided focused ultrasound surgery. *Annu Rev Med*. 2009; 60:417–30. doi: [10.1146/annurev.med.60.041707.170303](https://doi.org/10.1146/annurev.med.60.041707.170303) PMID: [19630579](https://pubmed.ncbi.nlm.nih.gov/19630579/); PubMed Central PMCID: PMC4005559.
