# Supplementary material for: Low Dose Focused Ultrasound Induces Enhanced Tumor Accumulation of Natural Killer Cells
Source: PLoS One. 2015 Nov 10;10(11):e0142767. doi: 10.1371/journal.pone.0142767 (PMC4640510; doi:10.1371/journal.pone.0142767)
Supplement: S4 Dataset — (XLSX) [file pone.0142767.s004.xlsx]

## Sheet: NK(CD56) counts
		Count	Total Area um^2	Average Size	%Area	Mean				Count	Total Area um^2	Average Size	%Area	Mean					Summary (+) anti-CD56	NK Cells / Total Cells			Summary (+) anti-CD56	NK Cells (10^3/mm^3)			Summary (+) anti-CD56	NK Cells / Total Cells Calculated
	noFUS_block1_sl02_07oct14_anti-CD56_1.tif	11	0.005	0.000434	0.003	123.898			FUS_block1_sl02_07oct14_anti-CD56_1.tif	15	0.132	0.009	0.084	78.483						no ldbFUS	ldbFUS			no ldbFUS	ldbFUS			no ldbFUS	ldbFUS		No FUS				FUS					6hr Post ldbFUS/Fe-NK				6hr Post ldbFUS/Fe-NK
	noFUS_block1_sl02_07oct14_anti-CD56_2.tif	6	74.468	12.411	0.012	255			FUS_block1_sl02_07oct14_anti-CD56_2.tif	36	0.079	0.002	0.051	68.373					sl02_07oct14	0.0252294	0.0117739		sl02_07oct14	3.91329	5.15313		sl02_07oct14	0.00704393	0.00927564		Count	Total Volume mm^3	count 10^3/mm^3		Count	Total Volume mm^3	count 10^3/mm^3			(-) ldbFUS	(+) ldbFUS		NK (CD56)	(-) ldbFUS	(+) ldbFUS			6hr Post ldbFUS/Fe-NK	Mean
	noFUS_block1_sl02_07oct14_anti-CD56_3.tif	5	155.177	31.035	0.026	85			FUS_block1_sl02_07oct14_anti-CD56_3.tif	26	481.341	18.513	0.08	60.444						0.027907	0.0226986			1.66198	10.8671			0.00299156	0.0195607		22	0.0113664	1.93553		77	0.00978097	7.87243		sl02_07oct14	0.348395	1.41704		Mean	0.374747	1.21383
	noFUS_block1_sl02_07oct14_DAPI_1.tif	436	156163	358.172	26.004	255	1561.63		FUS_block1_sl02_07oct14_DAPI_1.tif	1274	161714	126.934	26.928	255	1617.14					0.0059952	0.0316687			1.01106	7.30879			0.0018199	0.0131558										sl01_07oct14	0.55213	1.3812		Stdev	0.165785	0.321423
	noFUS_block1_sl02_07oct14_DAPI_2.tif	215	200564	932.856	33.397	255	2005.64		FUS_block1_sl02_07oct14_DAPI_2.tif	1586	184042	116.042	30.646	255	1840.42				sl01_07oct14	0.0217984	0.086444		sl01_07oct14	2.21612	17.0323		sl01_07oct14	0.00398902	0.0306582		No FUS				FUS				sl01_13jun14	0.223715	0.843264		Count	3	3				Stdev
	noFUS_block1_sl02_07oct14_DAPI_3.tif	834	274740	329.425	45.749	255	2747.4		FUS_block1_sl02_07oct14_DAPI_3.tif	821	197631	240.72	32.909	255	1976.31					0.0425844	0.0355114			4.78053	4.7566			0.00860495	0.00856189		Count	Total Volume mm^3	count 10^3/mm^3		Count	Total Volume mm^3	count 10^3/mm^3						SEM	0.0957162	0.185574
	DAPI 1 mm^3		0.00281093						DAPI 1 mm^3		0.00291085									0.0384615	0.0237154			1.90527	5.14465			0.00342948	0.00926036		49	0.0159745	3.06739		87	0.011338	7.67334						t-test	0.0158837
	DAPI 2 mm^3		0.00361015						DAPI 2 mm^3		0.00331276								sl01_13jun14	0.00735971	0.0147651		sl01_13jun14	2.26533	1.97249		sl01_13jun14	0.00407759	0.00355048
	DAPI 3 mm^3		0.00494533						DAPI 3 mm^3		0.00355736									0.00683371	0.0679739			1.39477	9.51175			0.00251058	0.0171211		No FUS				FUS
	anti-CD56 1 (+) count * 1000 / mm^3	0.0252294	3.91329				0.00704393		anti-CD56 1 (+) count * 1000 / mm^3	0.0117739	5.15313				0.00927564					0.000784929	0.00708104			0.515576	1.80967			0.000928037	0.0032574		Count	Total Volume mm^3	count 10^3/mm^3		Count	Total Volume mm^3	count 10^3/mm^3
	anti-CD56 2 (+) count * 1000 / mm^3	0.027907	1.66198				0.00299156		anti-CD56 2 (+) count * 1000 / mm^3	0.0226986	10.8671				0.0195607					0.00827586	0.00893522			2.17649	2.7338			0.00391768	0.00492083		56	0.0450573	1.24286		231	0.0493084	4.6848
	anti-CD56 3 (+) count * 1000 / mm^3	0.0059952	1.01106				0.0018199		anti-CD56 3 (+) count * 1000 / mm^3	0.0316687	7.30879				0.0131558					0.00133215	0.0301724			0.694842	6.9341			0.00125072	0.0124814															6hr Post ldbFUS/Fe-NK
		NK cells/ Total cells	NK cell concentration count 10^3/mm^3				NK (10^3/mm^3)			NK cells/ Total cells	NK cell concentration count 10^3/mm^3				NK (10^3/mm^3)					0.00410959	0.025788			1.11947	5.71223			0.00201504	0.010282														NK (CSFE)	(-) ldbFUS	(+) ldbFUS
	Mean	0.0197105	2.19544				0.0039518			0.0220471	7.77633				0.0139974					0.0085197	0.0321691			1.60702	6.34943			0.00289264	0.011429														mean	0.34993	0.589824
																				0	0.012685			0	4.76157			0	0.00857082														stdev	0.0706067	0.0484878
																				0.00384431	0.0124555			1.30108	2.66763			0.00234195	0.00480174		No FUS				FUS								count	6	4
	noFUS_block1_sl01_07oct14_anti-CD56_1.tif	8	47.843	5.98	0.008	85.759			FUS_block1_sl01_07oct14_anti-CD56_1.tif	44	136.456	3.101	0.023	83.809						0.00485437	0.0376851			0.77818	4.73605			0.00140072	0.0085249		Count	Total Cells Calculated	% NK Cells/Total Cells		Count	Total Cells Calculated	% NK Cells/Total Cells						sem	0.0288251	0.0242439
	noFUS_block1_sl01_07oct14_anti-CD56_2.tif	29	114.407	3.945	0.019	86.233			FUS_block1_sl01_07oct14_anti-CD56_2.tif	25	77.381	3.095	0.013	119.915						(-) ldbFUS	(+) ldbFUS			(-) ldbFUS	(+) ldbFUS			(-) ldbFUS	(+) ldbFUS		22	6314.67	0.348395		77	5433.87	1.41704						ttest	0.000370819
	noFUS_block1_sl01_07oct14_anti-CD56_3.tif	12	47.843	3.987	0.008	255			FUS_block1_sl01_07oct14_anti-CD56_3.tif	18	105.67	5.871	0.018	95.185					mean	0.0129931	0.0288451		mean	1.70881	6.09071		mean	0.00307586	0.0109633
	noFUS_block1_sl01_07oct14_DAPI_1.tif	367	200551	546.46	33.395	255	2005.51		FUS_block1_sl01_07oct14_DAPI_1.tif	509	143518	281.96	23.898	255	1435.18				stdev	0.0137054	0.0215329		stdev	1.22391	3.84769		stdev	0.00220303	0.00692584		No FUS				FUS
	noFUS_block1_sl01_07oct14_DAPI_2.tif	681	337015	494.883	56.119	255	3370.15		FUS_block1_sl01_07oct14_DAPI_2.tif	704	291992	414.761	48.621	255	2919.92				counts	16	16		counts	16	16		counts	16	16		Count	Total Cells Calculated	% NK Cells/Total Cells		Count	Total Cells Calculated	% NK Cells/Total Cells
	noFUS_block1_sl01_07oct14_DAPI_3.tif	312	349907	1121.5	58.265	255	3499.07		FUS_block1_sl01_07oct14_DAPI_3.tif	759	194377	256.096	32.367	255	1943.77				sem	0.00342635	0.00538324		sem	0.305977	0.961922		sem	0.000550758	0.00173146		49	8874.73	0.55213		87	6298.86	1.3812
	DAPI 1 mm^3		0.00360991						DAPI 1 mm^3		0.00258332								ttest	0.0187928			ttest	0.000148467			ttest	0.000148467
	DAPI 2 mm^3		0.00606627						DAPI 2 mm^3		0.00525585																				No FUS				FUS
	DAPI 3 mm^3		0.00629833						DAPI 3 mm^3		0.00349878																				Count	Total Cells Calculated	% NK Cells/Total Cells		Count	Total Cells Calculated	% NK Cells/Total Cells
	anti-CD56 1 (+) count * 1000 / mm^3	0.0217984	2.21612				0.00398902		anti-CD56 1 (+) count / Total count DAPI	0.086444	17.0323				0.0306582																56	25031.8	0.223715		231	27393.6	0.843264
	anti-CD56 2 (+) count * 1000 / mm^3	0.0425844	4.78053				0.00860495		anti-CD56 2 (+) count / Total count DAPI	0.0355114	4.7566				0.00856189
	anti-CD56 3 (+) count * 1000 / mm^3	0.0384615	1.90527				0.00342948		anti-CD56 3 (+) count / Total count DAPI	0.0237154	5.14465				0.00926036
		NK cells/ Total cells	NK cell concentration count 10^3/mm^3				NK (10^3/mm^3)			NK cells/ Total cells	NK cell concentration count 10^3/mm^3				NK (10^3/mm^3)
	Mean	0.0342814	2.96731				0.00534115			0.0485569	8.97786				0.0161602
		Count	Total Area	Average Size	%Area	Mean	Computed Number of Total Cells			Count	Total Area	Average Size	%Area	Mean	Computed Number of Total Cells
sl01_13jun14	tumor_nonFUS_444_anti-CD56_1.tif	8	32.866	4.108	0.005	127.849			sl01_13jun14_tumor_anti-CD-56_1.tif	11	34.946	3.177	0.006	85
	tumor_nonFUS_447_anti-CD56_2.tif	6	74.469	12.411	0.012	128.586			sl01_13jun14_tumor_anti-CD-56_2.tif	52	305.363	5.872	0.051	85
	tumor_nonFUS_Snap-498-anti-CD56.tif	1	163.84	163.84	0.0002771	115.75			sl01_13jun14_tumor_anti-CD-56_3.tif	9	22.049	2.45	0.004	85.128
	tumor_nonFUS_Snap-490-anti-CD56.tif	12	5201.92	433.493	0.009	129.3			sl01_13jun14_tumor_anti-CD-56_4_518.tif	12	31.202	2.6	0.005	85
	tumor_nonFUS_Snap-483-anti-CD56.tif	3	0.001	0.000434	0.0008313	91.083			sl01_13jun14_tumor_anti-CD56_5_339.tif	28	515.871	18.424	0.086	40.519
	tumor_nonFUS_Snap-461-anti-CD56.tif	6	3768.32	628.053	0.006	53.125			sl01_13jun14_tumor_anti-CD56_6_336.tif	18	156.425	8.69	0.026	66.502
	tumor_nonFUS_Snap-458-anti-CD56.tif	8	2048	256	0.003	127.409			sl01_13jun14_tumor_anti-CD56_7_334-1.tif	35	255.44	7.298	0.043	44.99
	tumor_nonFUS_Snap-454-anti-CD56.tif	0							sl01_13jun14_tumor_anti-CD56-Snap-354.tif	24	38297.6	1595.73	0.065	101.704
	tumor_nonFUS_Snap-451-anti-CD56.tif	8	1597.44	199.68	0.003	95.656			sl01_13jun14_tumor_anti-CD-56-Snap-506.tif	14	7249.92	517.851	0.012	46.633
	tumor_nonFUS_Snap-463-anti-CD56.tif	4	4751.36	1187.84	0.008	98.584			sl01_13jun14_tumor_anti-CD-56-Snap-440.tif	28	30761	1098.61	0.052	104.907
	tumor_nonFUS_445_DAPI_1.tif	1087	196194	180.491	32.67	62.983	1961.94		sl01_13jun14_tumor_DAPI_1-Snap-510.tif	745	309817	415.862	51.59	38.202	3098.17
	tumor_nonFUS_448_DAPI_2.tif	878	238988	272.196	39.795	49.904	2389.88		sl01_13jun14_tumor_DAPI_2-Snap-513.tif	765	303718	397.017	50.574	27.968	3037.18
	tumor_nonFUS_Snap-499-DAPI.tif	1274	107754	8457.95	18.224	60.993	1077.54		sl01_13jun14_tumor_DAPI_3-Snap-516.tif	1271	276294	217.383	46.007	30.51	2762.94
	tumor_nonFUS_Snap-491-DAPI.tif	1450	306304	21124.4	51.805	54.586	3063.04		sl01_13jun14_tumor_DAPI_4-Snap-519.tif	1343	243861	181.579	40.607	28.074	2438.61
	tumor_nonFUS_Snap-484-DAPI.tif	2252	239863	10651.1	40.568	49.229	2398.63		sl01_13jun14_tumor_DAPI_5_338-1.tif	928	224334	241.739	37.355	55.679	2243.34
	tumor_nonFUS_Snap-462-DAPI.tif	1460	297761	20394.6	50.36	43.322	2977.61		sl01_13jun14_tumor_DAPI_6_335-1.tif	698	175063	250.807	29.151	34.287	1750.63
	tumor_nonFUS_Snap-459-DAPI.tif	939	276564	29453	46.775	55.288	2765.64		sl01_13jun14_tumor_DAPI_7_333-1.tif	1088	306239	281.47	50.994	41.304	3062.39
	tumor_nonFUS_Snap-455-DAPI.tif	1477	212590	14393.4	35.955	57.55	2125.9		sl01_13jun14_tumor_DAPI_8-Snap-353.tif	1892	280020	148.002	46.628	31.66	2800.2
	tumor_nonFUS_Snap-453-DAPI.tif	2081	341596	16415	57.774	44.196	3415.96		sl01_13jun14_tumor_DAPI_9_Snap-507.tif	1124	291561	259.396	48.55	30.867	2915.61
	tumor_nonFUS_Snap-465-DAPI.tif	824	285567	34656.1	48.297	46.626	2855.67		sl01_13jun14_tumor_DAPI-Snap-439.tif	743	328450	442.059	54.692	49.864	3284.5
	DAPI 1 mm^3		0.0035315						DAPI volume in mm^3		0.00557671
	DAPI 2 mm^3		0.00430179						converted DAPI Total area to mm^2 multiplied by slice thickness (0.018mm)		0.00546692
			0.00193958								0.00497329
			0.00551347								0.0043895
			0.00431753								0.00403801
			0.0053597								0.00315113
			0.00497815								0.0055123
			0.00382662								0.00504036
			0.00614873								0.0052481
			0.0051402								0.00591209
		NK cells/ Total cells	NK cell concentration count 10^3/mm^3				NK (10^3/mm^3)			NK cells/ Total cells	NK cell concentration count 10^3/mm^3				NK (10^3/mm^3)
		0.00735971	2.26533				0.00407759			0.0147651	1.97249				0.00355048
		0.00683371	1.39477				0.00251058			0.0679739	9.51175				0.0171211
		0.000784929	0.515576				0.000928037			0.00708104	1.80967				0.0032574
		0.00827586	2.17649				0.00391768			0.00893522	2.7338				0.00492083
		0.00133215	0.694842				0.00125072			0.0301724	6.9341				0.0124814
		0.00410959	1.11947				0.00201504			0.025788	5.71223				0.010282
		0.0085197	1.60702				0.00289264			0.0321691	6.34943				0.011429
		0	0				0			0.012685	4.76157				0.00857082
		0.00384431	1.30108				0.00234195			0.0124555	2.66763				0.00480174
		0.00485437	0.77818				0.00140072			0.0376851	4.73605				0.0085249
	average	0.00459143	1.18528				0.0021335			0.024971	4.71887				0.00849397
	stdev	0.00314025	0.718652				0.00129357			0.0184974	2.48732				0.00447717														NK Cells / Total Cells Calculated			NK Cells / Total Cells Calculated
																													single ICK	multi ICK		single ICK	multi ICK
																													0.00704393	0.00398902		0.704393	0.398902
																													0.00299156	0.00860495		0.299156	0.860495
																													0.0018199	0.00342948		0.18199	0.342948
																													0.00407759			0.407759
																													0.00251058			0.251058
																													0.000928037			0.0928037
																													0.00391768			0.391768
																													0.00125072			0.125072
																													0.00201504			0.201504
																													0.00289264			0.289264
																													0			0
																													0.00234195			0.234195
																													0.00140072			0.140072
[truncated: 3 more columns]

## Sheet: NK_CSFE counts
Section	FITC Count	FITC Count (<80mm2)	mask area [pixels]	FITC Cells/Mask vol[mm^3]		FITC Cells (<<80mm2)/mask vol [mm^3]					Mask Area mm^2	Total Cells Calculated	NK Cells /Total Cells x 100%	NK Cells /Total Cells x 100%				NK Cells /Total Cells x 100%				FITC Cells/Mask vol[mm^3]									FITC Cells (<<80mm2)/mask vol [mm^3]
FUS-Top Left	474	268	2278686	197.469		111.649					7.51892	75189.2	0.63041	0.00356434				All sizes				All sizes									Size: <<80um2
FUS-Top Right	463	242	2247412	195.57		102.22					7.41572	74157.2	0.624349	0.00326334												10^3/mm^3									10^3/mm^3
FUS-Bottom Left	430	234	2252024	181.259		98.6388					7.43094	74309.4	0.578662	0.003149					no ldbFUS	ldbFUS			no ldbFUS	ldbFUS			no ldbFUS	ldbFUS				no ldbFUS	ldbFUS			no ldbFUS	ldbFUS
FUS-Bottom Right	402	206	2316713	164.725		84.4112					7.64439	76443.9	0.525876	0.00269479					0.475327	0.63041			148.891	111.649			0.148891	0.111649				76.9152	111.649			0.0769152	0.111649
No Fus-Top Left	211	109	1345301	148.891		76.9152					4.43905	44390.5	0.475327	0.00245548					0.308157	0.624349			96.5269	195.57			0.0965269	0.19557				52.0829	102.22			0.0520829	0.10222
No Fus-Top Middle	139	75	1367009	96.5269		52.0829					4.51068	45106.8	0.308157	0.00166272					0.371592	0.578662			116.397	181.259			0.116397	0.181259				47.348	98.6388			0.047348	0.0986388
No FUS-Top Right	177	72	1443564	116.397		47.348					4.76329	47632.9	0.371592	0.00151156					0.359468	0.525876			112.599	164.725			0.112599	0.164725				74.1984	84.4112			0.0741984	0.0844112
No FUS-Bottom Left	173	114	1458529	112.599		74.1984					4.81267	48126.7	0.359468	0.00236875					0.304859				95.4936				0.0954936					60.2761				0.0602761
No FUS-Bottom Middle	141	89	1401683	95.4936		60.2761					4.62509	46250.9	0.304859	0.00192429					0.280176				87.7621				0.0877621					37.1547				0.0371547
No FUS-Bottom Right	137	58	1481899	87.7621		37.1547					4.88978	48897.8	0.280176	0.00118615
																			6hr Post ldbFUS/Fe-NK				6hr Post ldbFUS/Fe-NK				6hr Post ldbFUS/Fe-NK
				average	stdev	average	stdev				Resolution of scanned slide								(-) ldbFUS	(+) ldbFUS			(-) ldbFUS	(+) ldbFUS			(-) ldbFUS	(+) ldbFUS				(-) ldbFUS	(+) ldbFUS			(-) ldbFUS	(+) ldbFUS
Exclusions		FUS	(+) ldbFUS	184.756	15.1883	99.2299	11.3008				0.0018165	mm/pixel						mean	0.34993	0.589824		mean	109.612	163.301		mean	0.109612	0.163301			mean	57.9959	99.2299		mean	0.0579959	0.0992299
15-255 Bright		no FUS	(-) ldbFUS	109.612	22.1168	57.9959	15.5458											stdev	0.0706067	0.0484878		stdev	22.1168	36.6686		stdev	0.0221168	0.0366686			stdev	15.5458	11.3008		stdev	0.0155458	0.0113008
		T-Test		0.000370819		0.00192682												count	6	4		count	6	4		count	6	4			count	6	4		count	6	4
		ratio FUS / no FUS		1.68555		1.71098												sem	0.0288251	0.0242439		sem	9.02913	18.3343		sem	0.00902913	0.0183343			sem	6.34654	5.6504		sem	0.00634654	0.0056504
																		ttest	0.000370819			ttest	0.0192152			ttest	0.0192152				ttest	0.00192682			ttest	0.00192682
12Nov2014 NK-CSFE
FUS
X	40.0862	5520	0.00726199	mm/pixel
Y	22.745	3136	0.00725286	mm/pixel	1.0534e-06	vol [mm^3]
Z			0.02	mm thickness			area		Total Cells	NK Cells
	# tumor pixels		9094835				479.027	mm^2
	volume		9.58054	mm^3			4.79027e+08	um^2	4.79027e+06	950
	# green cells		950	1769
	cells/mm^3		99.1593	184.645
no FUS
X	44.429	6120	0.00725963	mm
Y	21.1497	2912	0.00726296	mm
Z			0.02	mm			area		Total Cells
	# tumor pixels		8497985				448.068	mm^2
	volume		8.96136	mm^3			4.48068e+08	um^2	4.48068e+06	517
	# green cells		517	978
	cells/mm^3		57.6921	109.135
FUS/noFUS	1.71877	1.69189
